# Supplementary material for: IRF3 and type I interferons fuel a fatal response to myocardial infarction
Source: Springer Nature journal article supplement (doi:10.1038/nm.4428), 2017-11-06
Supplement: 41591_2017_BFnm4428_MOESM1_ESM.pdf [file 41591_2017_BFnm4428_MOESM1_ESM.pdf]

**IRF3 and Type I Inteferons  
Fuel a Fatal Response to Myocardial Infarction  
(NMED-L84840A)**

**Supplementary Figures**

# Supplementary Fig. 1

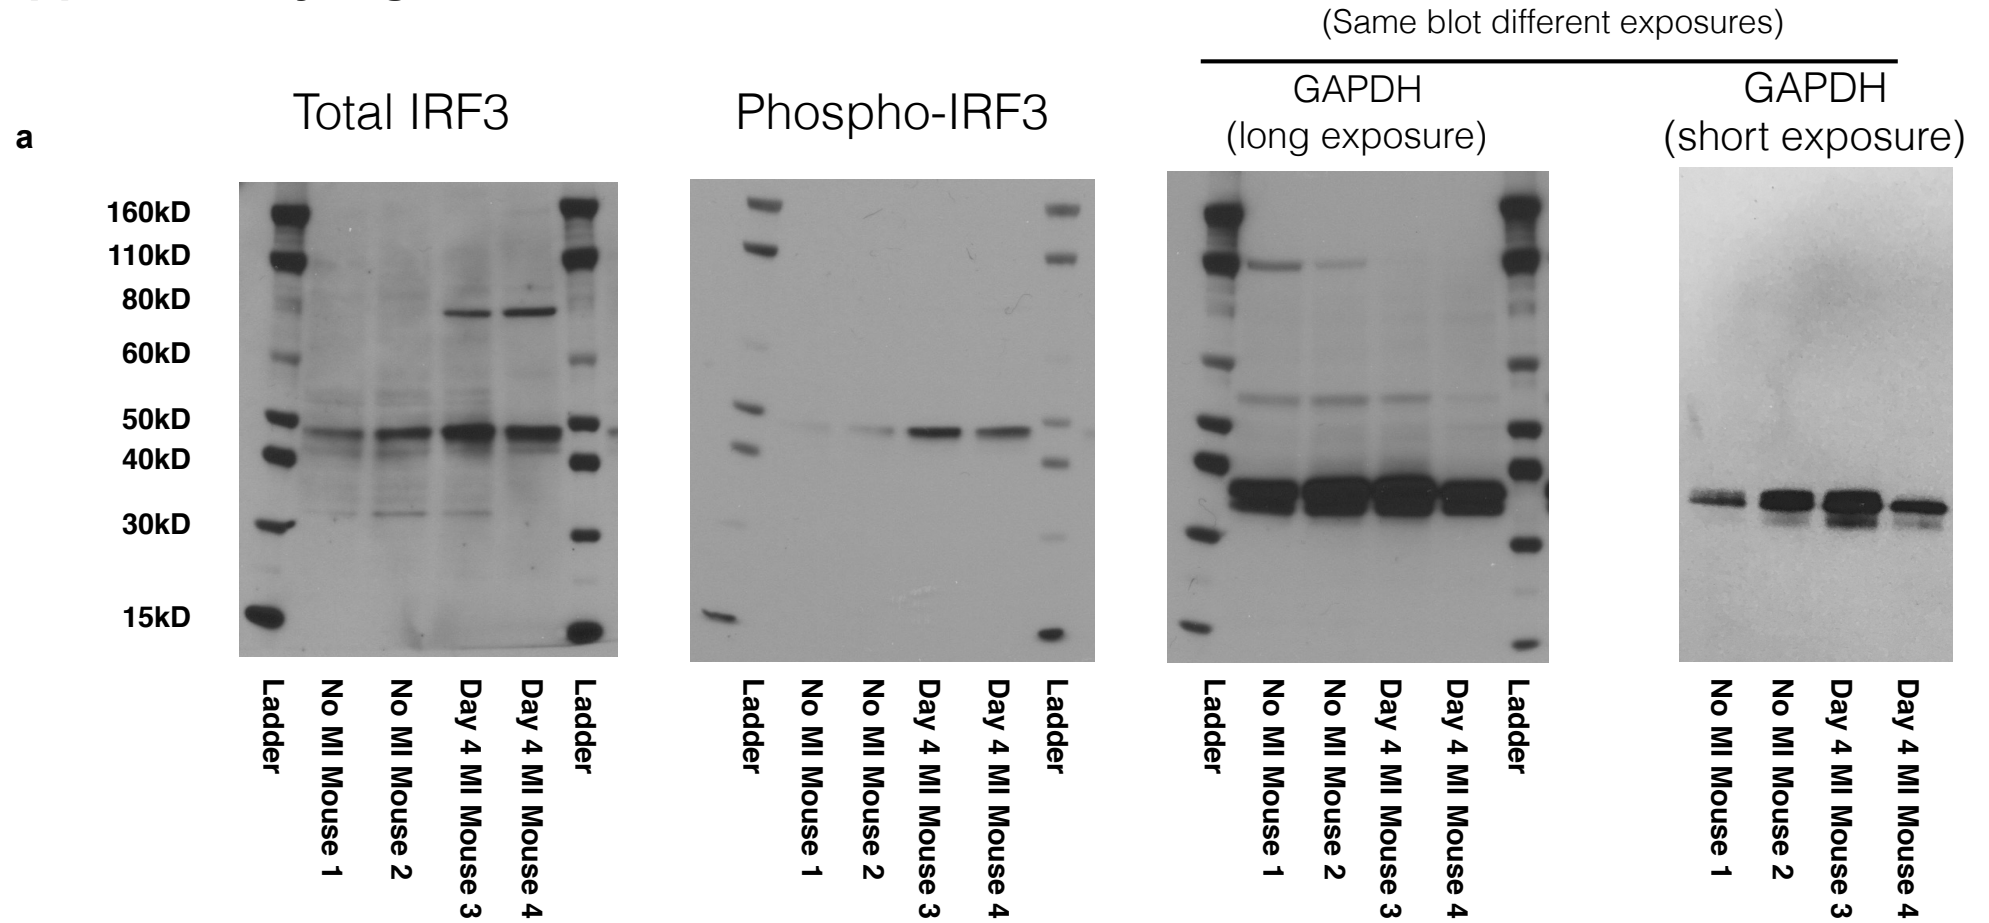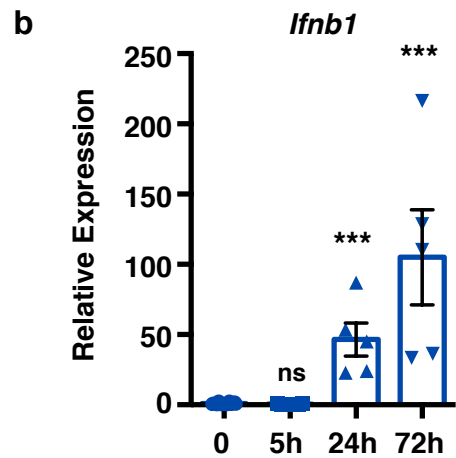

**Supplementary Fig. 1 (a)** Full gel images of western blot for total IRF3, Phospho-IRF3, and GAPDH loading control at 2 exposures (n=4 mice, 2 with no MI, 2 from day 4 MI). **(b)** Expression of *Ifnb1* from WT whole infarct tissue at various times (5h, 24h, 72h) after MI (n=5 per group). Mean  $\pm$  s.e.m. \*\*\*  $P < 0.001$

## Supplementary Fig. 2

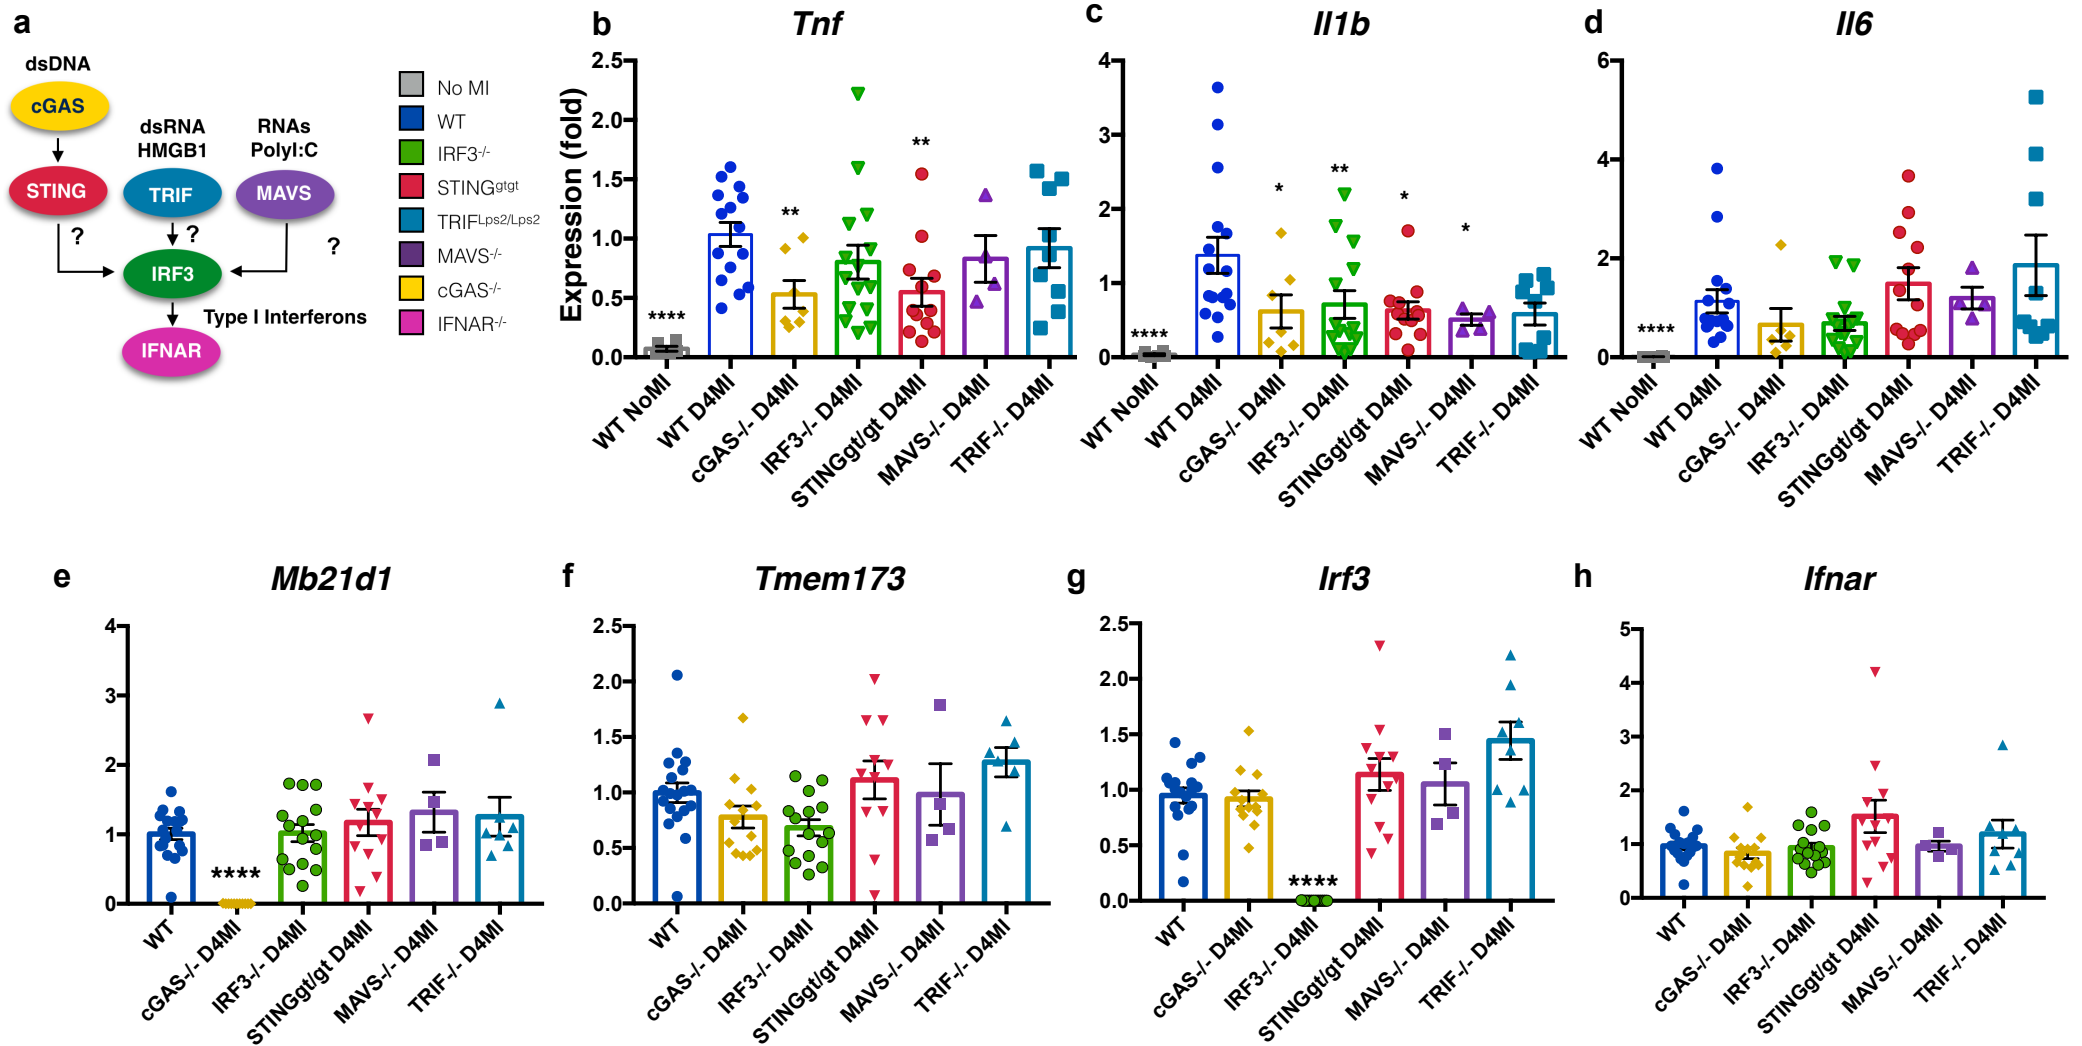

**Supplementary Fig. 2.** Gene expression from mice deficient in key molecules of the IRF3-activating pathways on day 4 after MI. **(a)** Schematic of IRF3-activating pathways. Quantitative PCR measurement of **(b)** *Tnf* **(c)** *Il1b* **(d)** *Il6*, **(e)** *Mb21d1* (cGAS), **(f)** *Tmem173* (*STING*), **(g)** *Irf3*, and **(h)** *Ifnar* from infarct tissue of various knockout mice on day 4 after MI. WT (n=16, dark blue), *cGAS*<sup>-/-</sup> (n=7, yellow), *Irf3*<sup>-/-</sup> (n=15, green), *STING*<sup>glt</sup> (n=12, red), *Mavs*<sup>-/-</sup> (n=4, purple), and *Trif*<sup>Lps2</sup> (n=9, light blue). \**P* < 0.05, \*\**P* < 0.01, Mean ± s.e.m.

# Supplementary Fig. 3

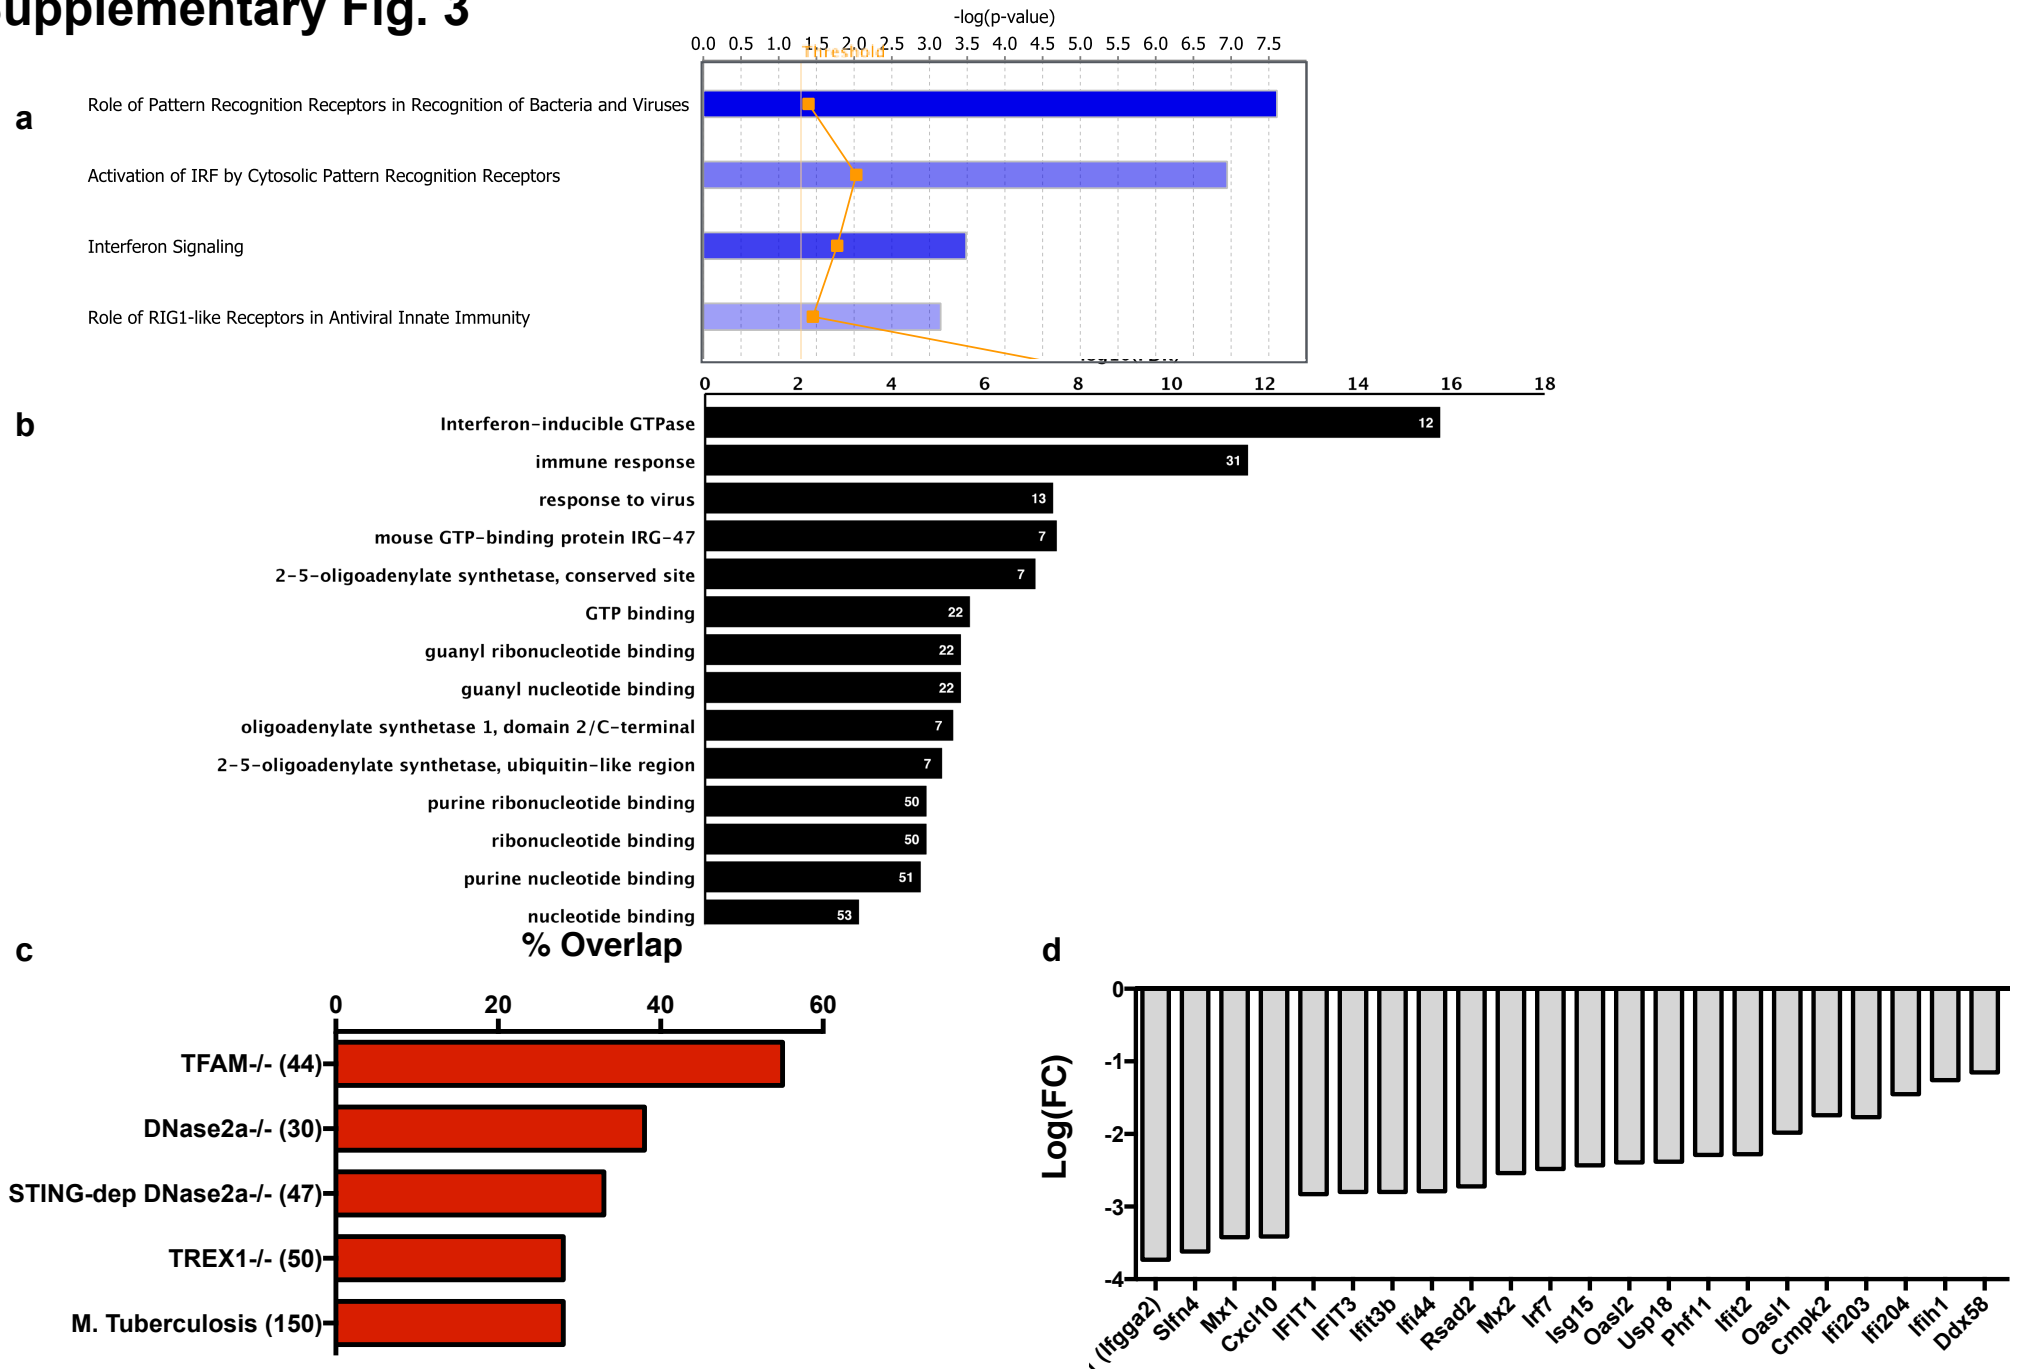

**Supplementary Fig. 3** RNA Seq genome wide expression profiling of MI-induced IRF3- dependent genes. Genes differentially expressed by *WT* and *Irf3*<sup>-/-</sup> mice (n=3) on day 4 after MI were classified by **(a)** Ingenuity Pathway Analysis and **(b)** DAVID Functional Classification Tools. **(c-d)** Comparison of MI-induced IRF3-dependent genes with prior studies implicating cytosolic DNA sensing. **(c)** Percent overlap (red bars) of *Irf3*<sup>-/-</sup> vs. *WT* mice MI-induced differentially expressed genes (DEGs) compared to DEGs from published studies implicating cytosolic DNA as an inducer of the type I IFN response (number of genes in reference study is indicated in parenthases). **(d)** MI-induced IRF3-dependent DEGs found in 3 or more prior studies implicating cytosolic DNA sensing as the inducing stimulus.



## Supplementary Fig. 5

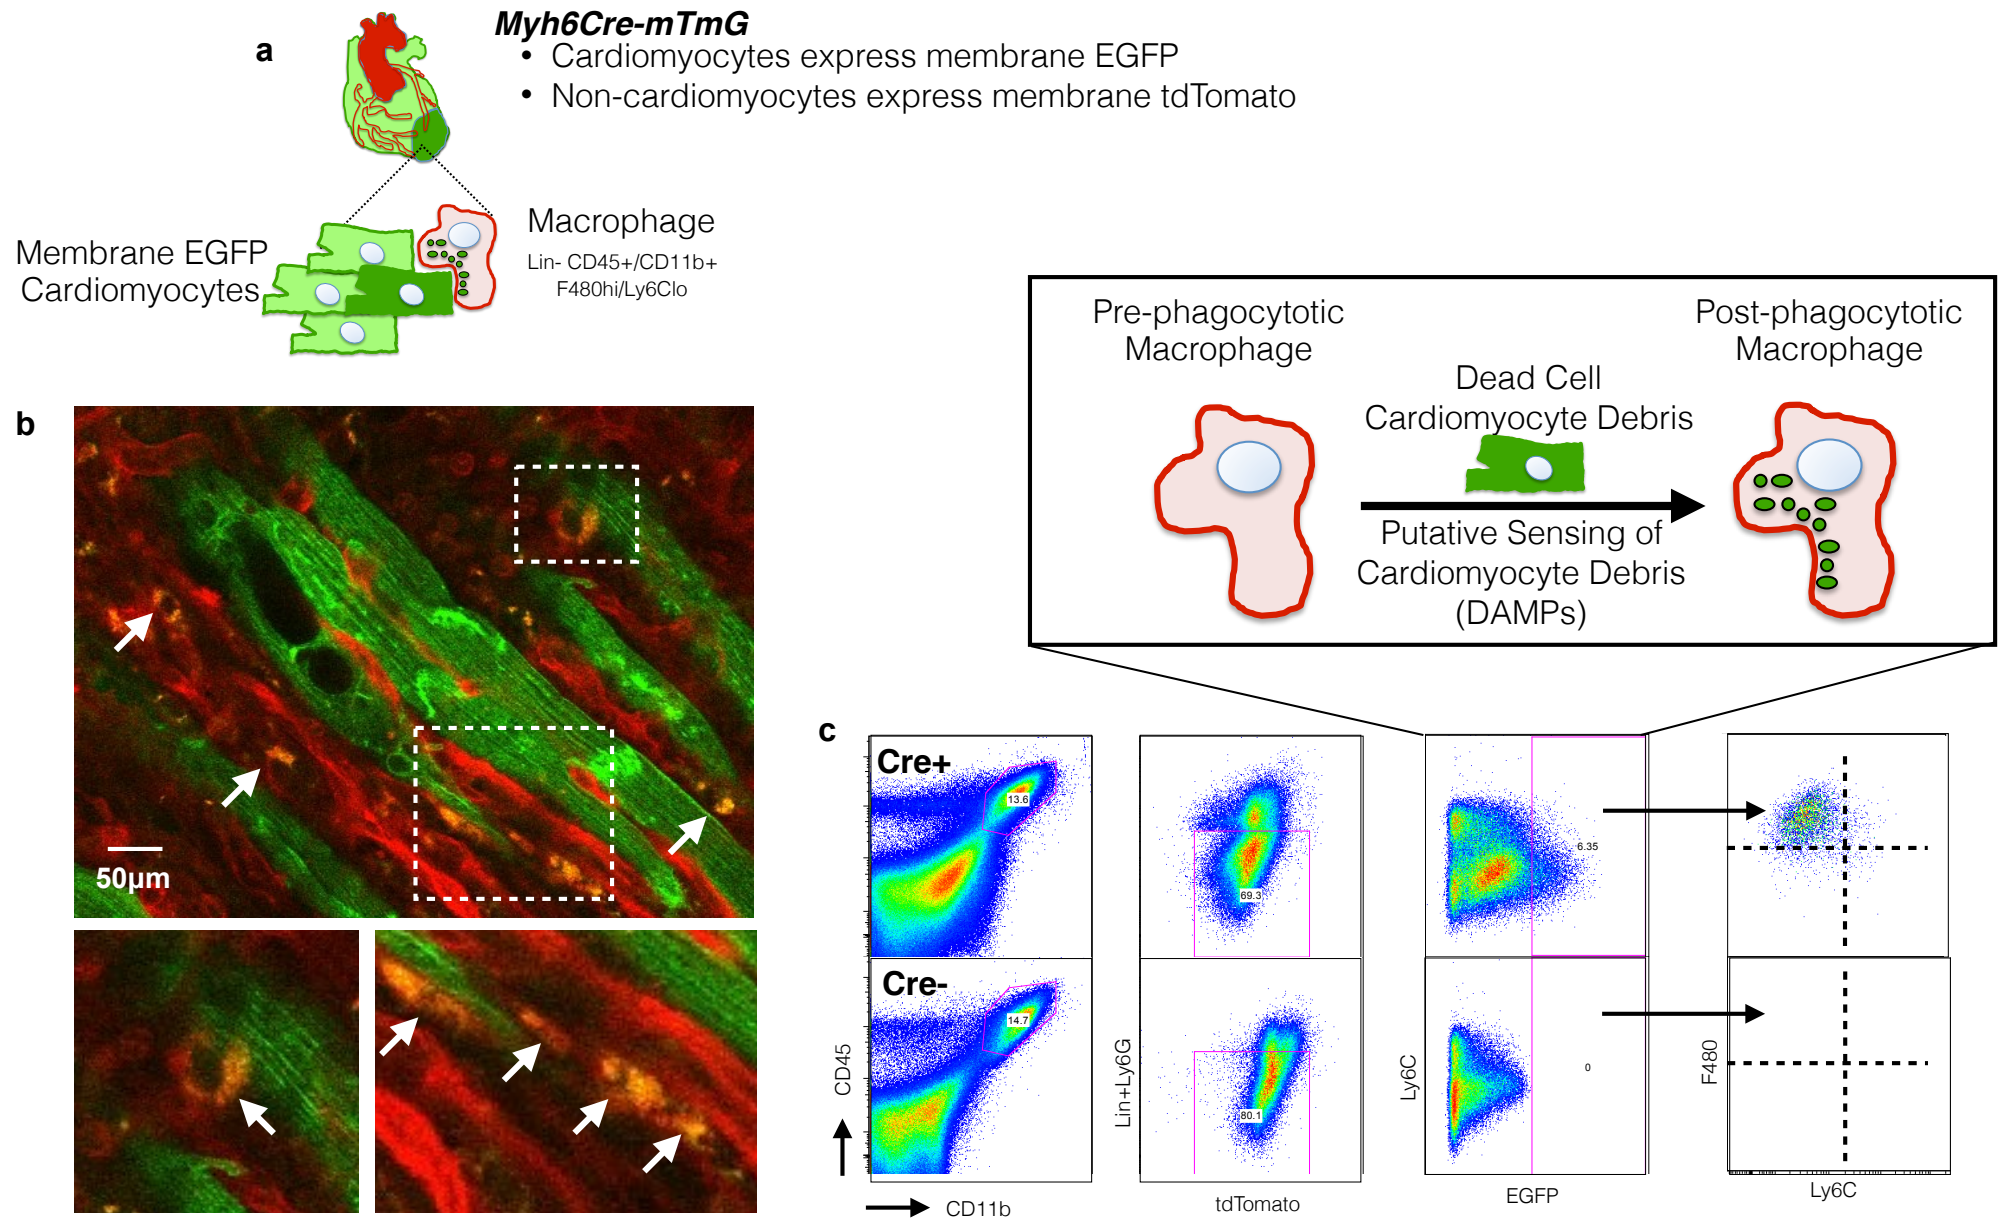

**Supplementary Fig. 5 (a)** Schematic of gating strategy for Myh6Cre-mTmG reporter strategy for sorting leukocytes most likely to be interacting with cardiomyocyte DAMPs such as DNA. **(b)** Two-photon microscopy of infarct borderzone on day 4 after MI. Cardiomyocytes express membrane EGFP (green) after Myh6-Cre mediated recombination. All other cells express membrane tdTomato (red). Arrows highlight cells with yellow cytoplasmic fluorescence. **(c)** Sorting and gating strategy to collect leukocytes most likely to have interacted with or phagocytosed cardiomyocyte DAMPs. A stringent background fluorescence is identified in the EGFP channel using an infarcted Cre<sup>-</sup> mouse to account of cellular autofluorescence. This enables sorting of cells from a Cre<sup>+</sup> mouse (in which cardiomyocytes express EGFP) that have taken up or are interacting with cardiomyocyte debris (have EGFP fluorescence above the stringent background established by the Cre<sup>-</sup> cells).

## Supplementary Fig. 6

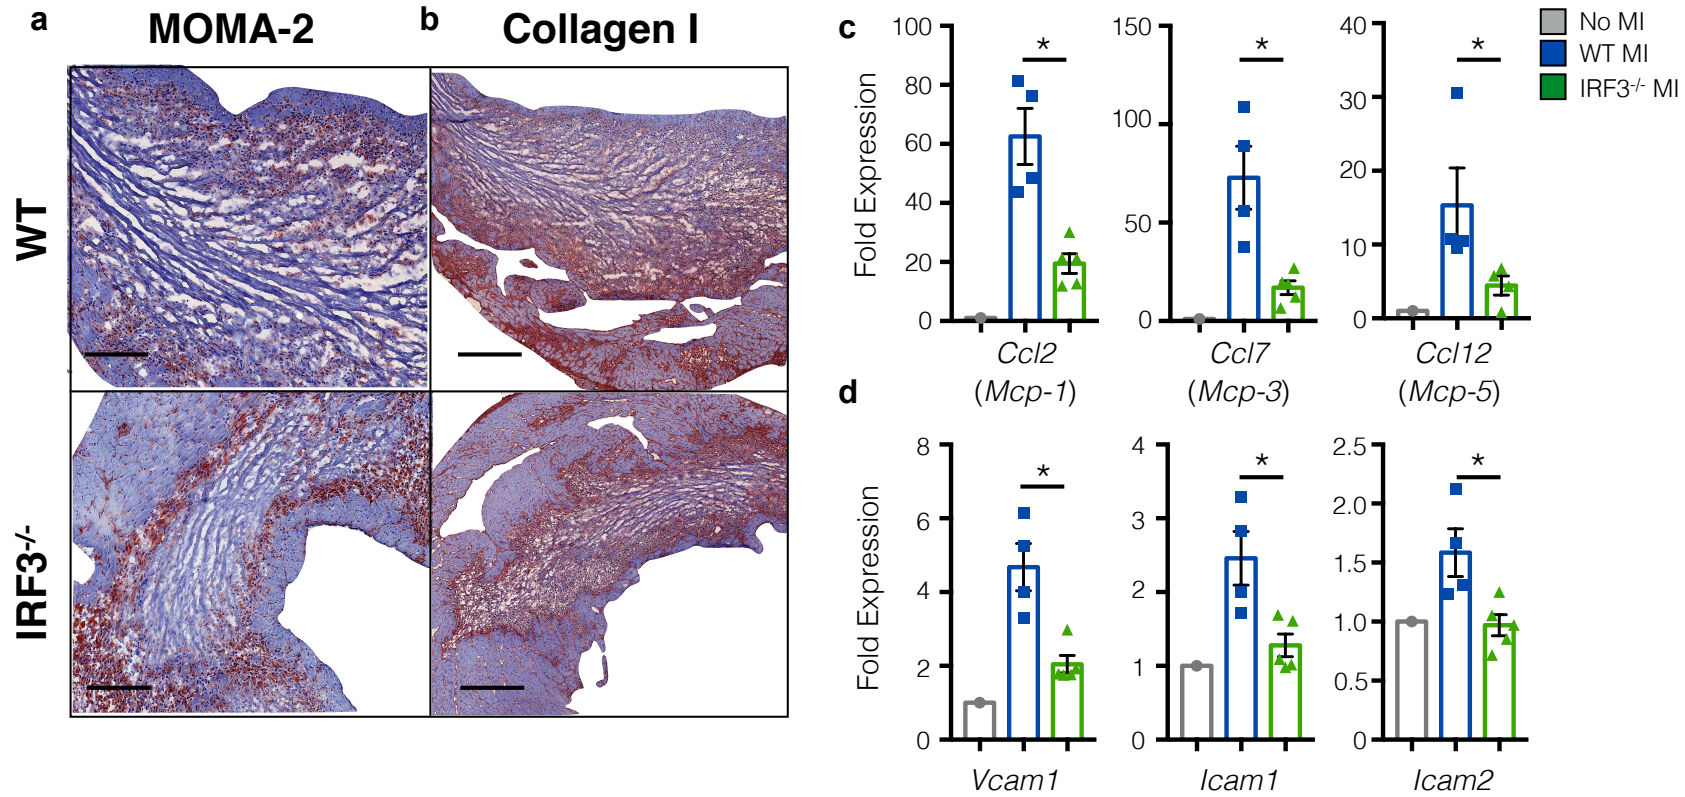

**Supplementary Fig. 6.** Immunohistochemical staining of *WT* and *Irf3*<sup>-/-</sup> mice on day 4 after MI for **(a)** Monocyte/macrophage (MOMA-2) and **(b)** collagen I immunohistochemical staining in the borderzones and infarcts. **(c)** Expression of chemokines (*Ccl2*, *Ccl7*, and *Ccl12*) **(d)** and cell adhesion molecules (*Vcam1*, *Icam1*, and *Icam2*) were more highly induced in *WT* mice than *Irf3*<sup>-/-</sup> mice.

## Supplementary Fig. 7

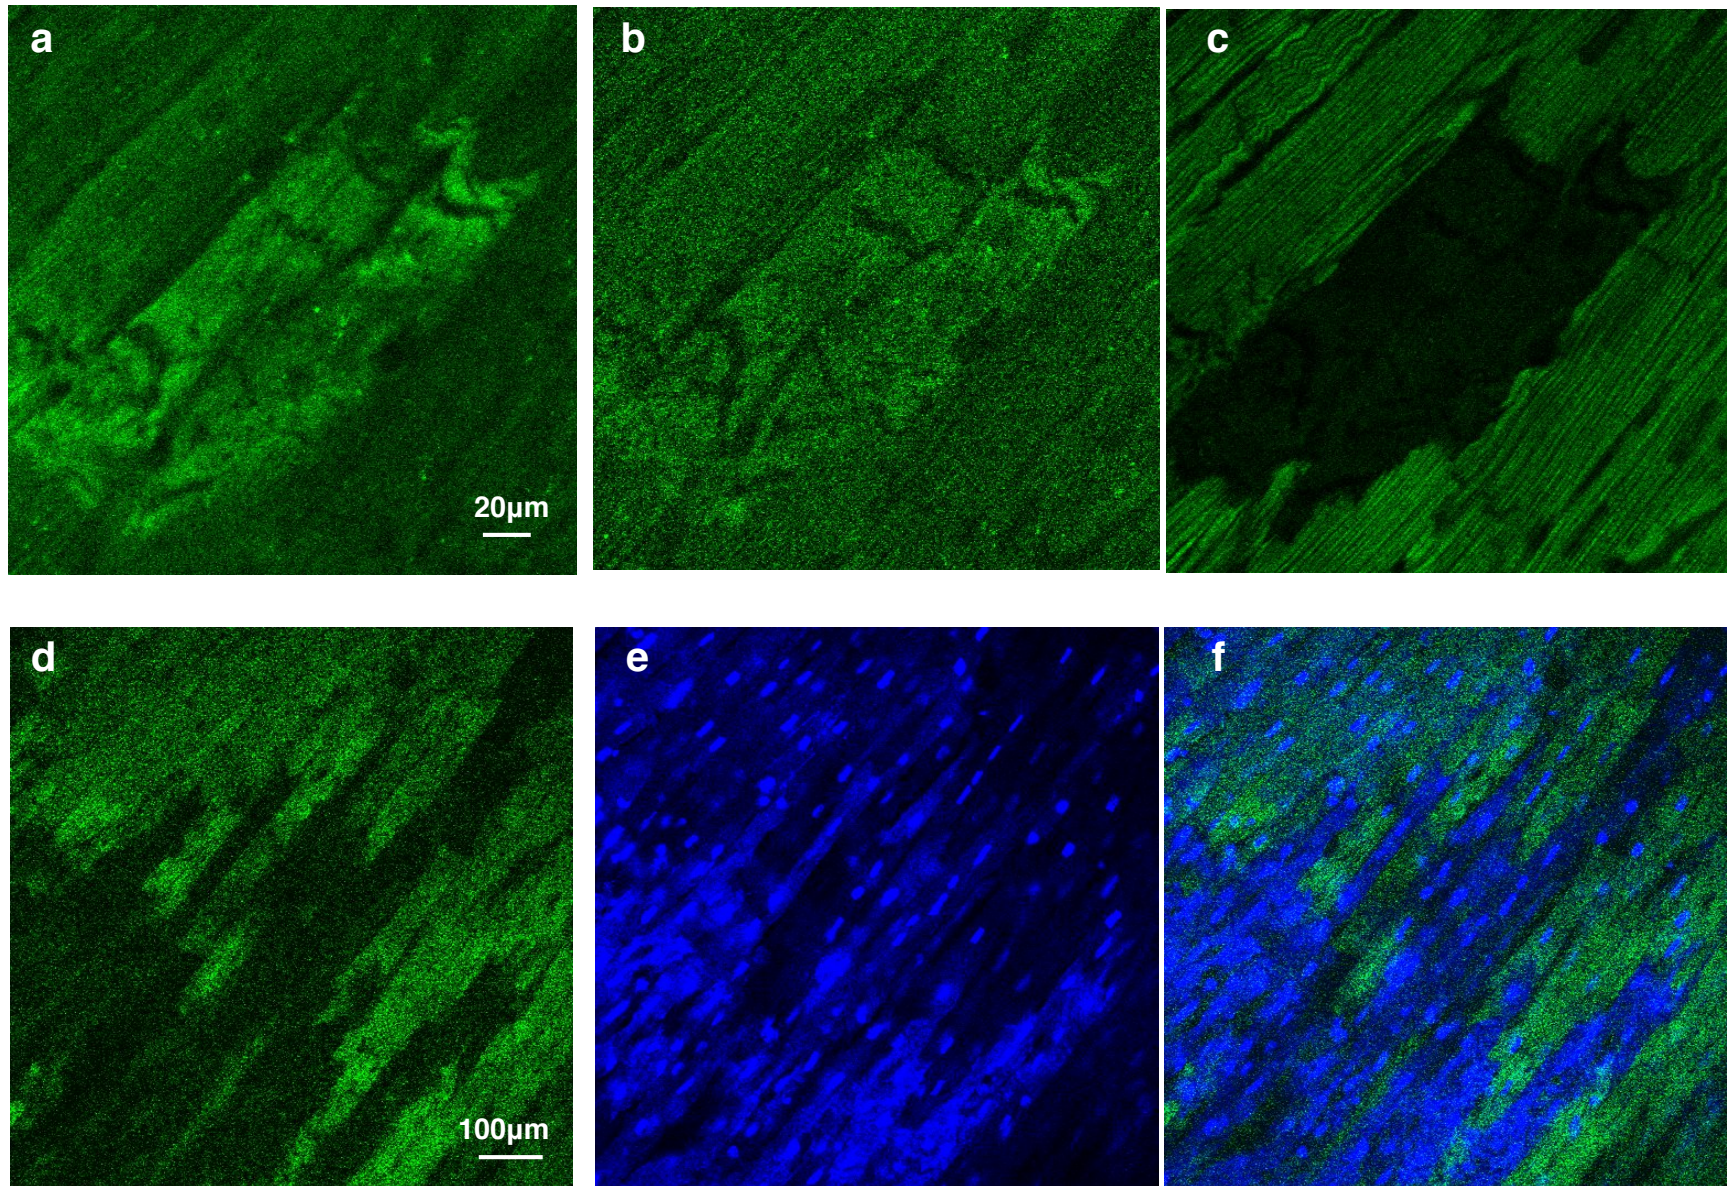

**Supplementary Fig. 7** Fluorescence microscopy of dsDNA release from injured cardiomyocyte after MI. **(a-c)** Ex vivo imaging of injured cardiomyocyte autofluorescence with characteristic contraction bands are demonstrated by **(a)** confocal microscopy (460nm excitation) **(b)** two photon microscopy (910nm), and **(c)** two photon imaging at 750nm excitation. Imaging at 750nm shows complete loss of autofluorescence in injured cells. **(d-f)** Borderzone of an infarct after coronary ligation and topical application of the double-stranded DNA fluorescence probe, Pico Green. **(d)** Two photon autofluorescence at 750nm excitation illustrates loss of NADH autofluorescence in injured cells at the infarct borderzone. **(e)** dsDNA-bound PicoGreen fluorescence. **(f)** Overlay of NADH autofluorescence and dsDNA-bound PicoGreen.



## Supplementary Fig. 8

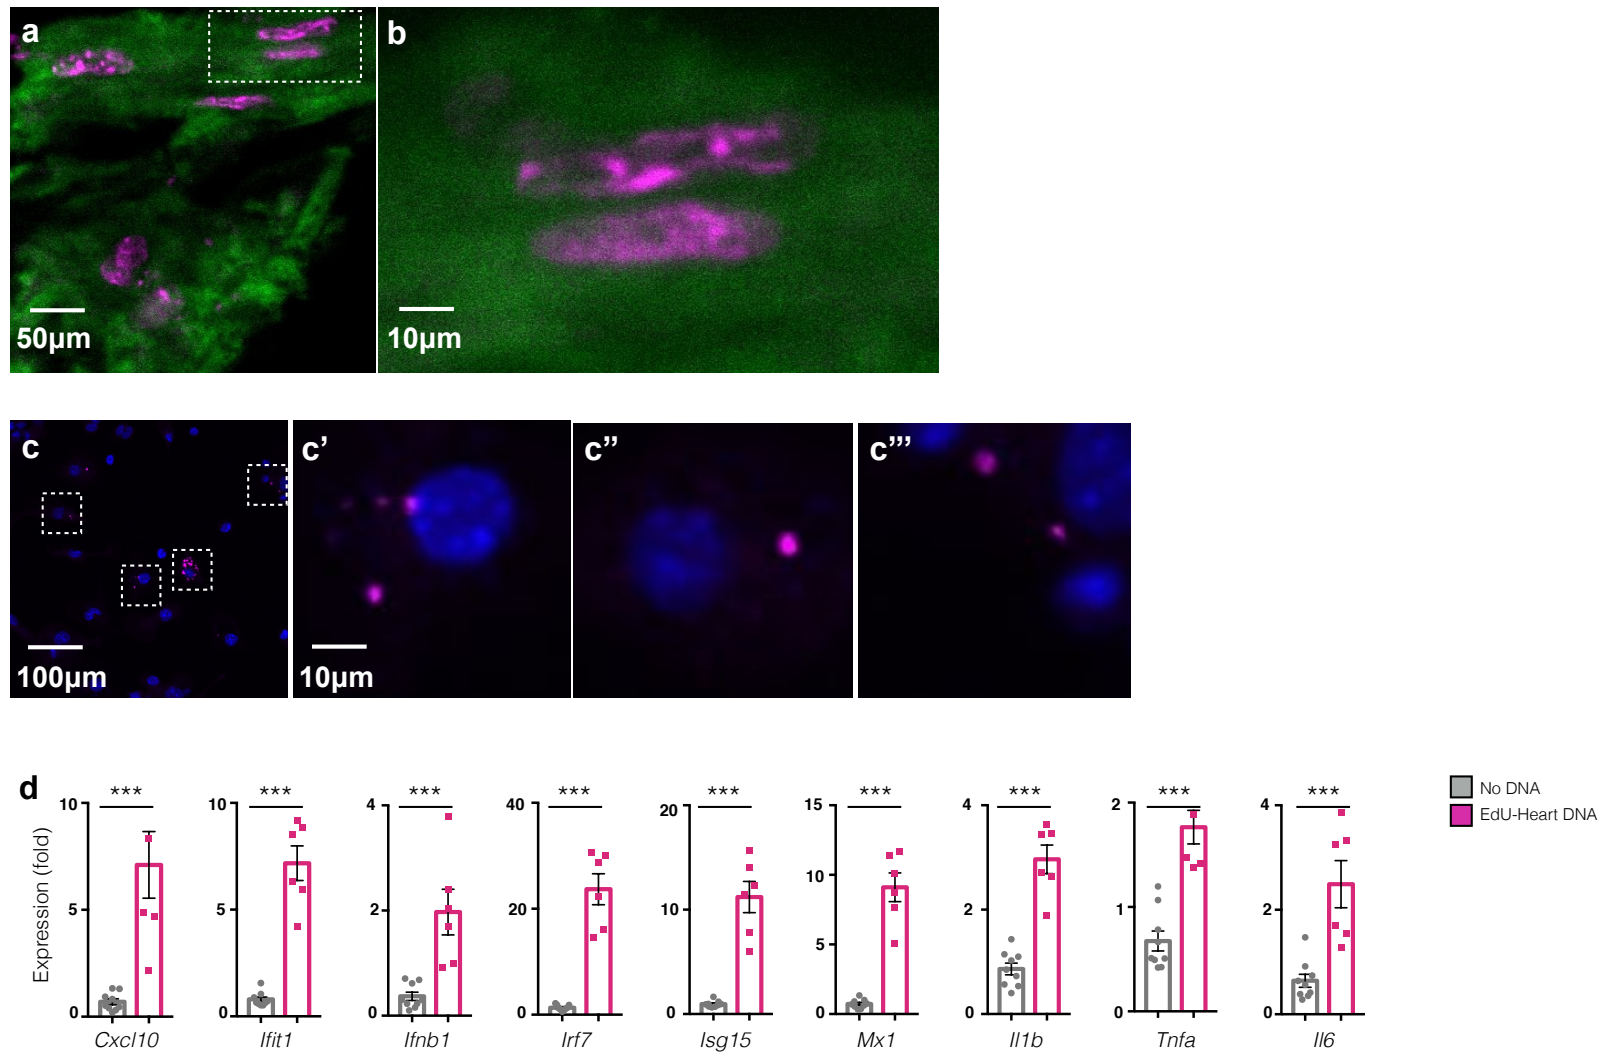

**Supplementary Fig. 8.** EdU labeling of adult cardiomyocyte nuclei and DNA uptake. Pregnant mice are injected with EdU on post-conception days 12, 16, and 20 to label offspring in utero. **(a)** EdU stained hearts from 10 week-old offspring click reacted to alexafluor 647 azide. **(b-c)** dsDNA was isolated from hearts of mice labeled in utero with EdU and delivered to cultured bone marrow derived macrophage (BMDM) with LTX Lipofectamine. BMDM were either **(b)** fixed, permeabilized, and click reacted with azide alexafluor 647 for imaging, or **(c)** lysed for RNA extraction and RT-PCR for interferon stimulated gene expression.

## Supplementary Fig. 9

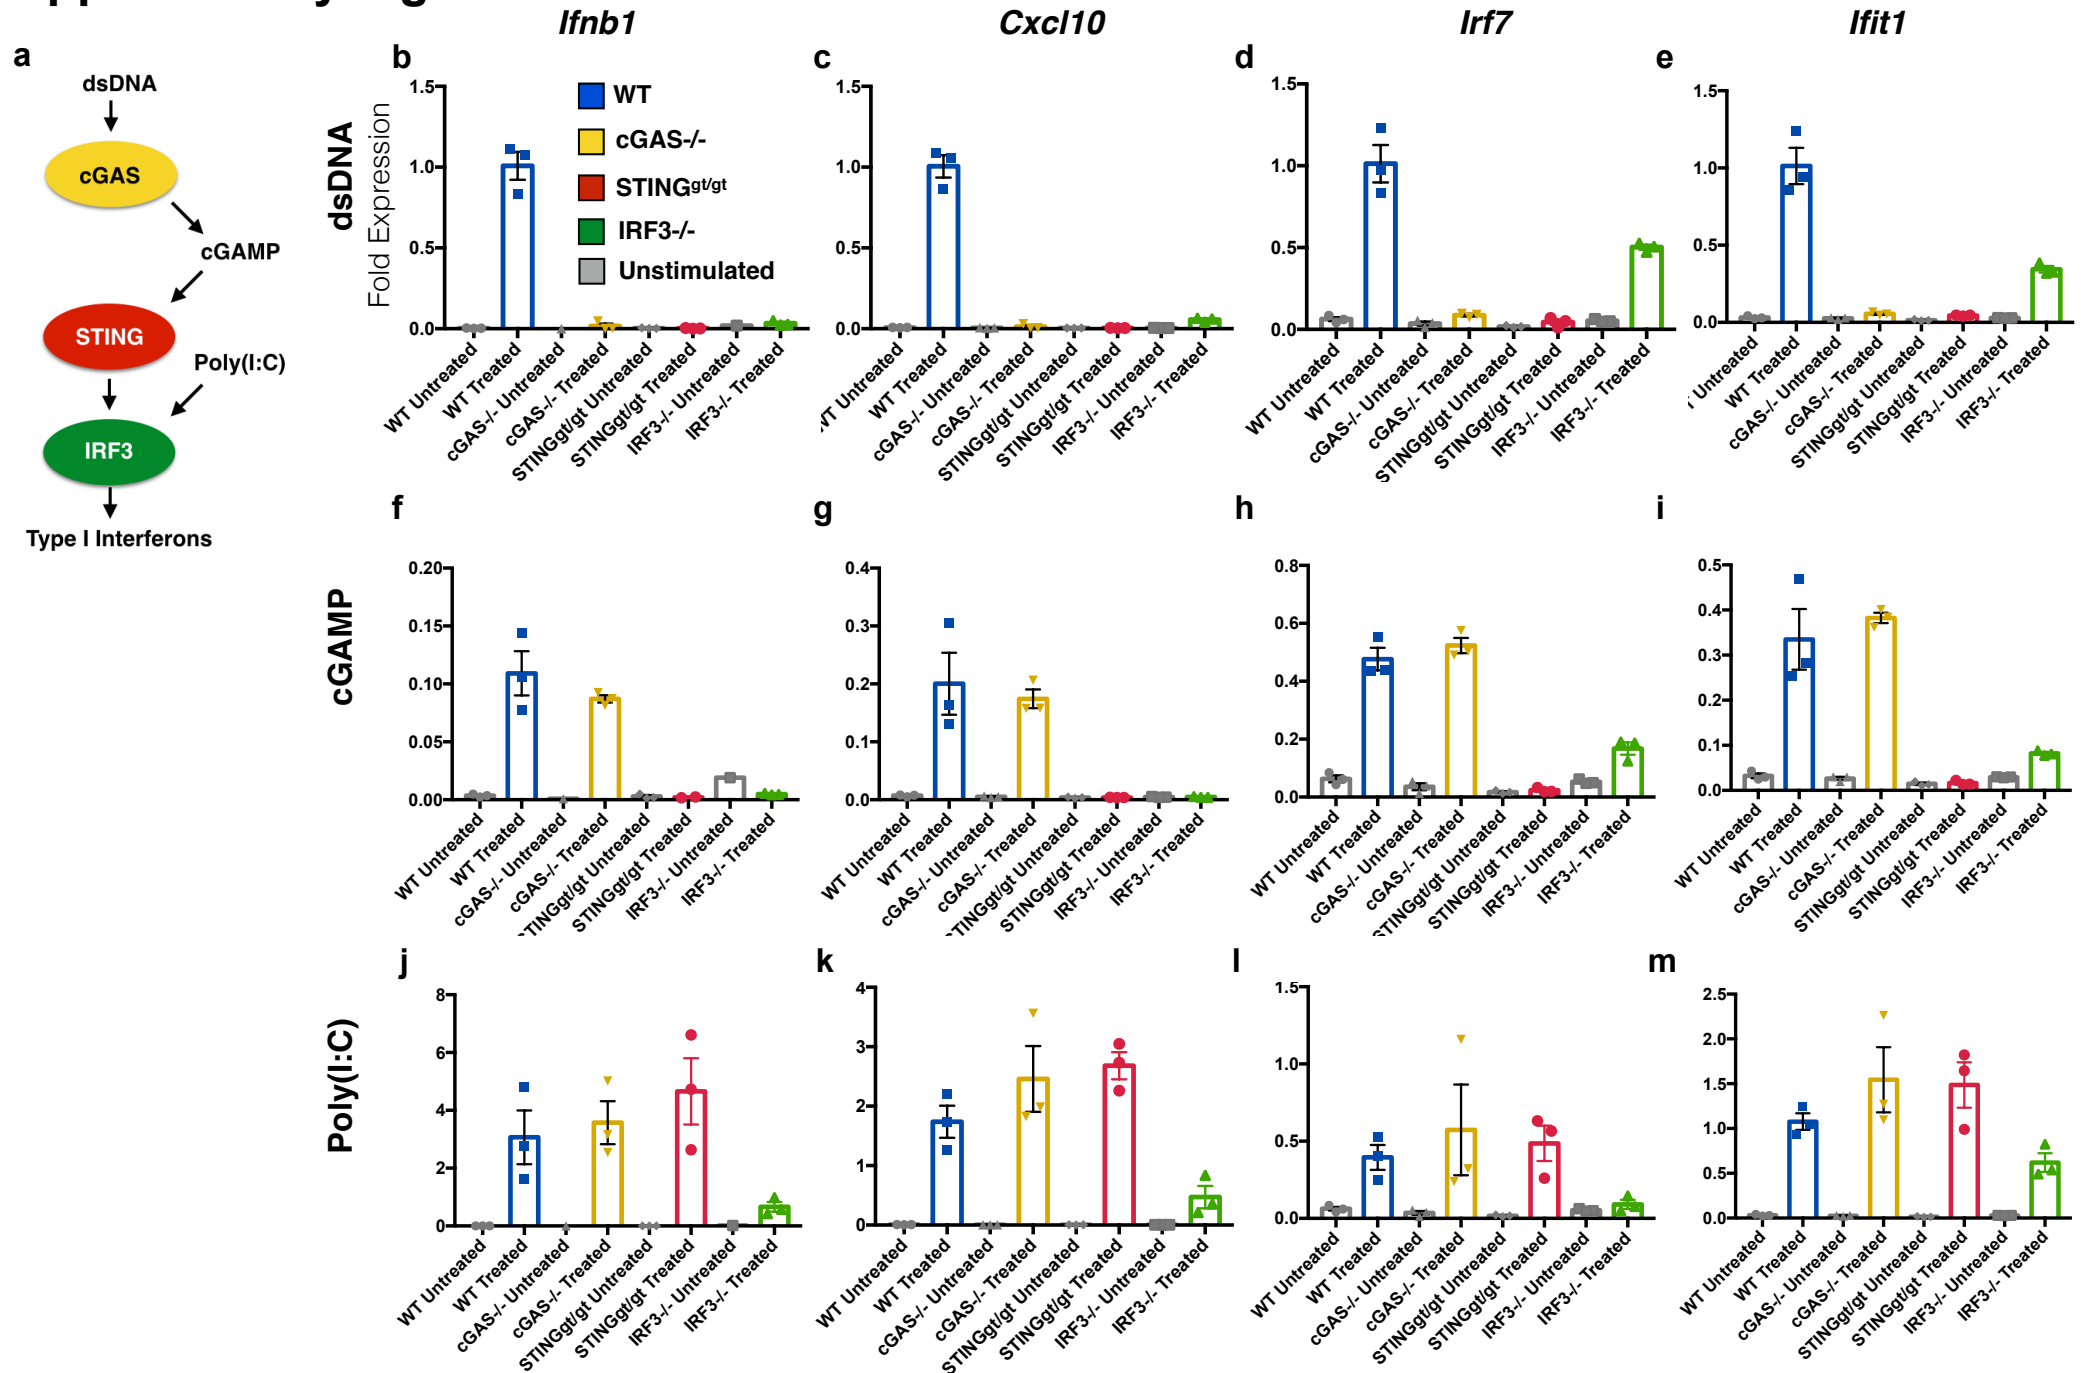

**Supplementary Fig. 9** Bone marrow derived macrophages (BMDMs) cytosolic DNA sensing pathway activation by extracellular stimuli. **(a)** Schematic of cytosolic DNA sensing pathway. **(b-m)** BMDM from various mouse strains stimulated with inerte immune stimuli such as dsDNA **(b-e)**, the STING agonist cGAMP **(f-i)** or the STING-independent IRF3 activator Poly(I:C) **(j-m)** for 24 hours. Quantitative PCR expression of *Ifnb1* **(b,f,j)**, *Cxcl10* **(c,g,k)**, *Irf7* **(d,h,l)**, and *Ifit1* **(e,i,m)**. (n=3) Mean  $\pm$  s.e.m.

## Supplementary Fig. 10

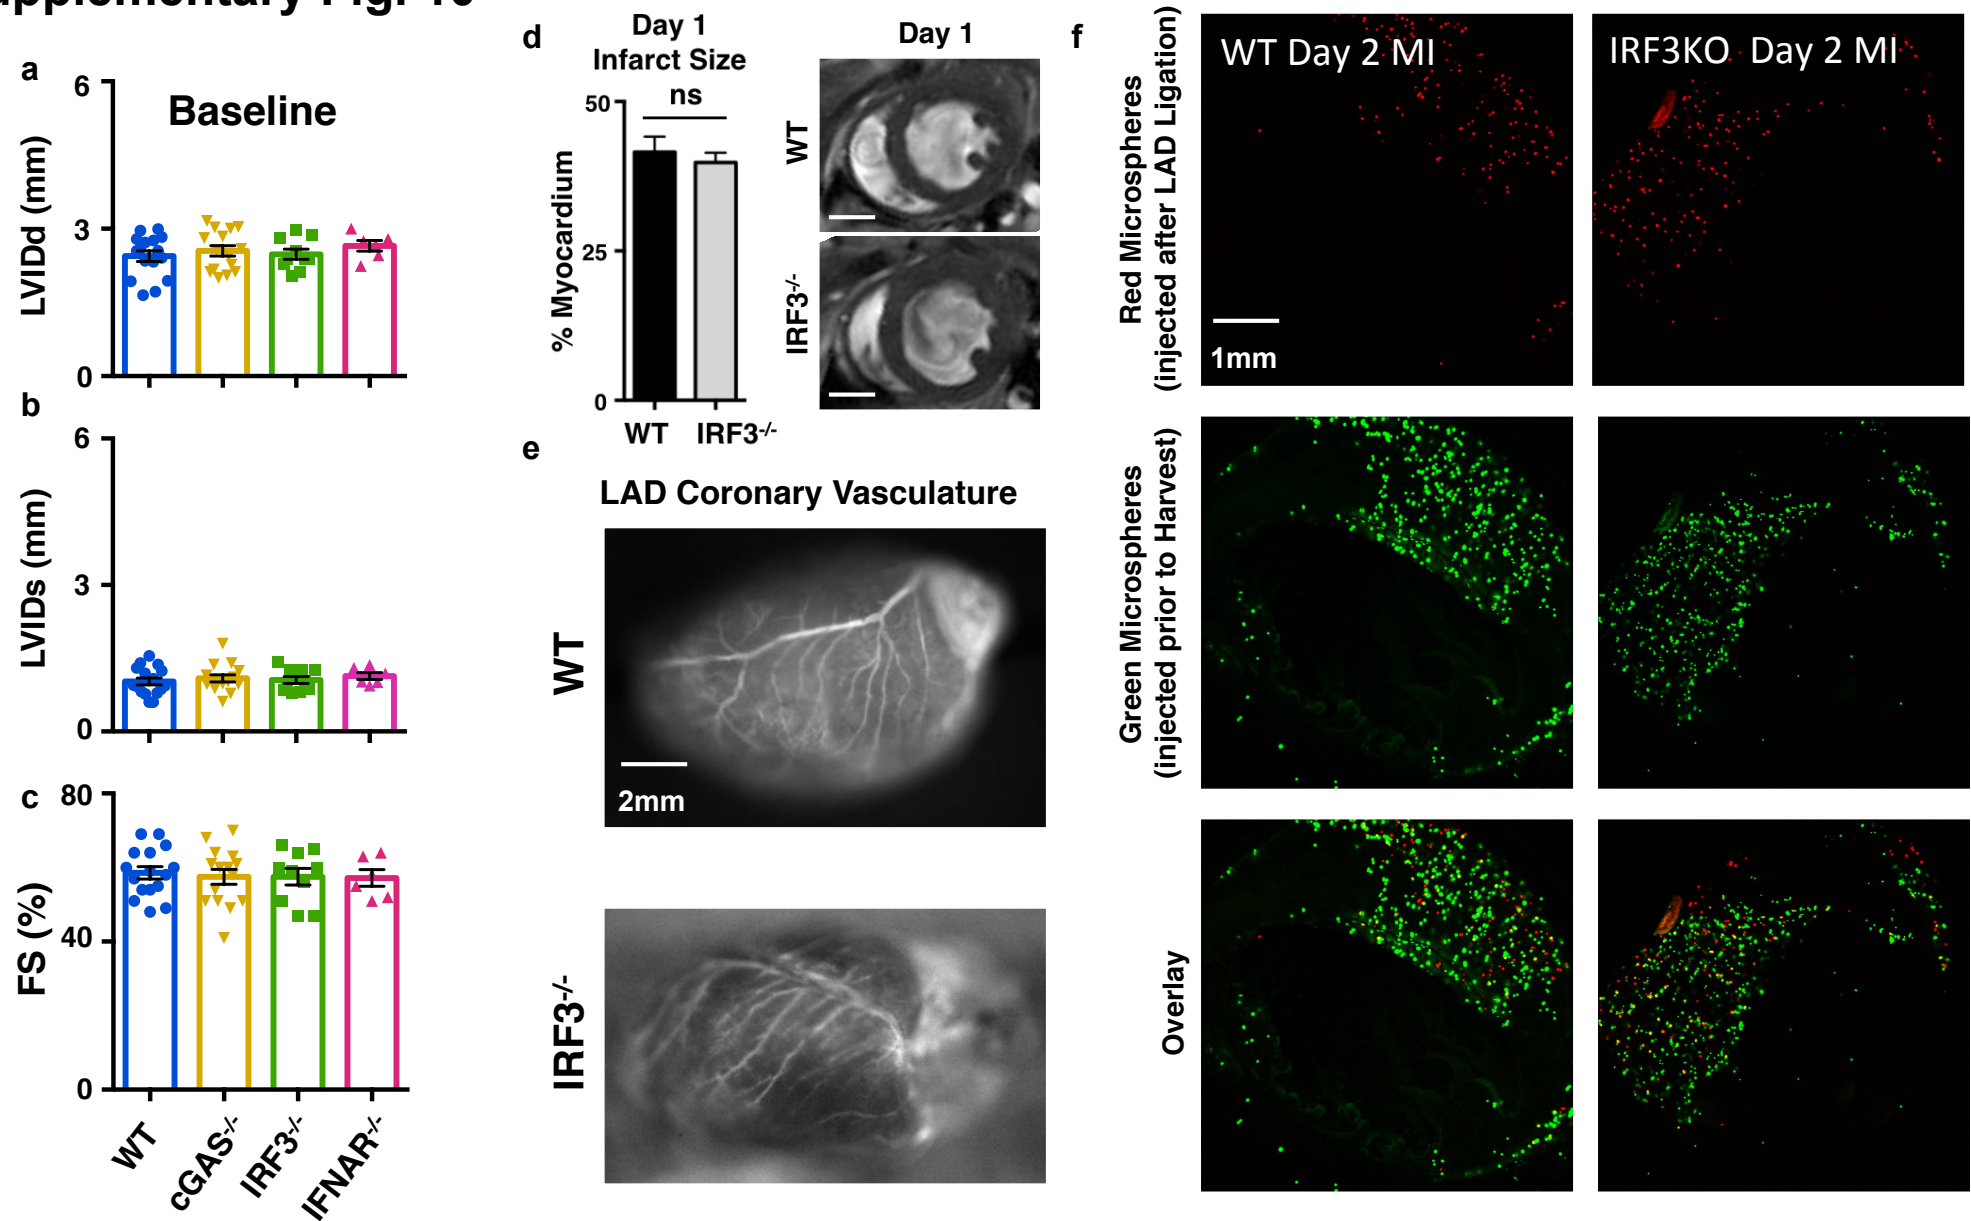

**Supplementary Fig. 10.** Echocardiographic, cardiac MRI, and fluorescence evaluation of baseline function, initial infarct size, coronary anatomy, and degree of spontaneous reperfusion. Baseline echocardiographic quantification of a) left ventricular end-diastolic dimensions (LVIDd), b) end-systolic dimensions (LVIDs), and c) fractional shortening (FS %) in *WT*, *cGas*<sup>-/-</sup>, *Irf3*<sup>-/-</sup>, and *Ifnar*<sup>-/-</sup> mice. d) To evaluate infarct size on day 1 after MI, *WT* and *Irf3*<sup>-/-</sup> mice were injected with gadolinium contrast and serial short axis sections were imaged by cardiac MRI. The area of enhancement was quantified, normalized to total myocardial mass, and reported as % Myocardium infarcted. e) *WT* and *Irf3*<sup>-/-</sup> mice were injected with high molecular weight FITC dextran and the anterior wall was imaged on an Olympus OV110 small animal imaging system to examine coronary artery anatomy. Representative images of the anterior wall of *WT* and *Irf3*<sup>-/-</sup> mice are shown. f) Red fluorescent microspheres were injected into the apex immediately following LAD ligation. At the time of harvest, green fluorescent microspheres were injected into the apex. On day 2, mice ventricles were collected and cut in short axis. Representative images of red microspheres (top), green microspheres (middle), and the overlay are shown.

# Supplementary Fig. 11

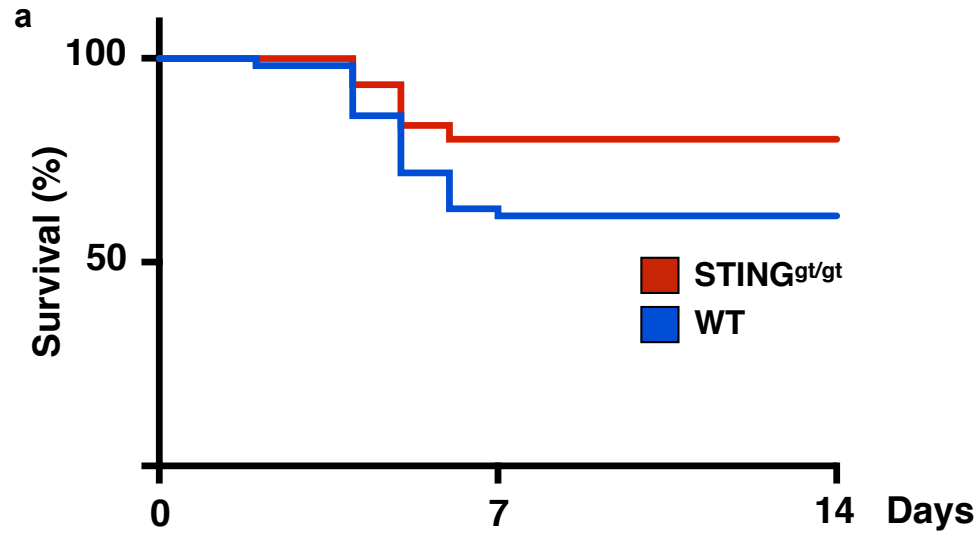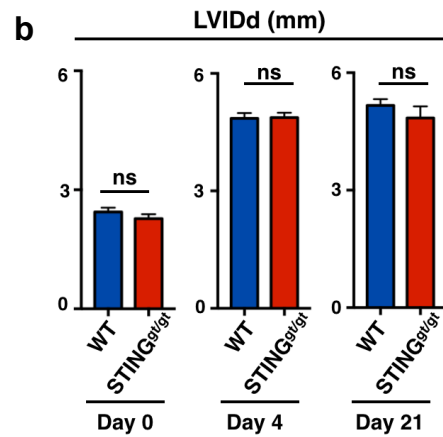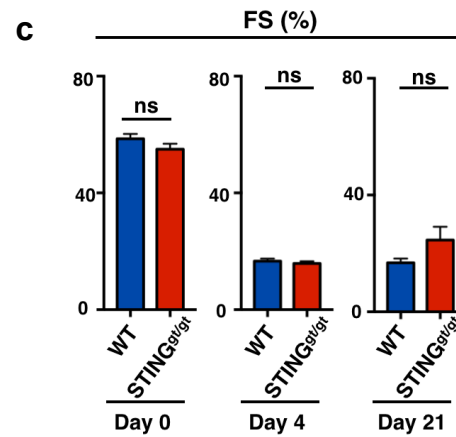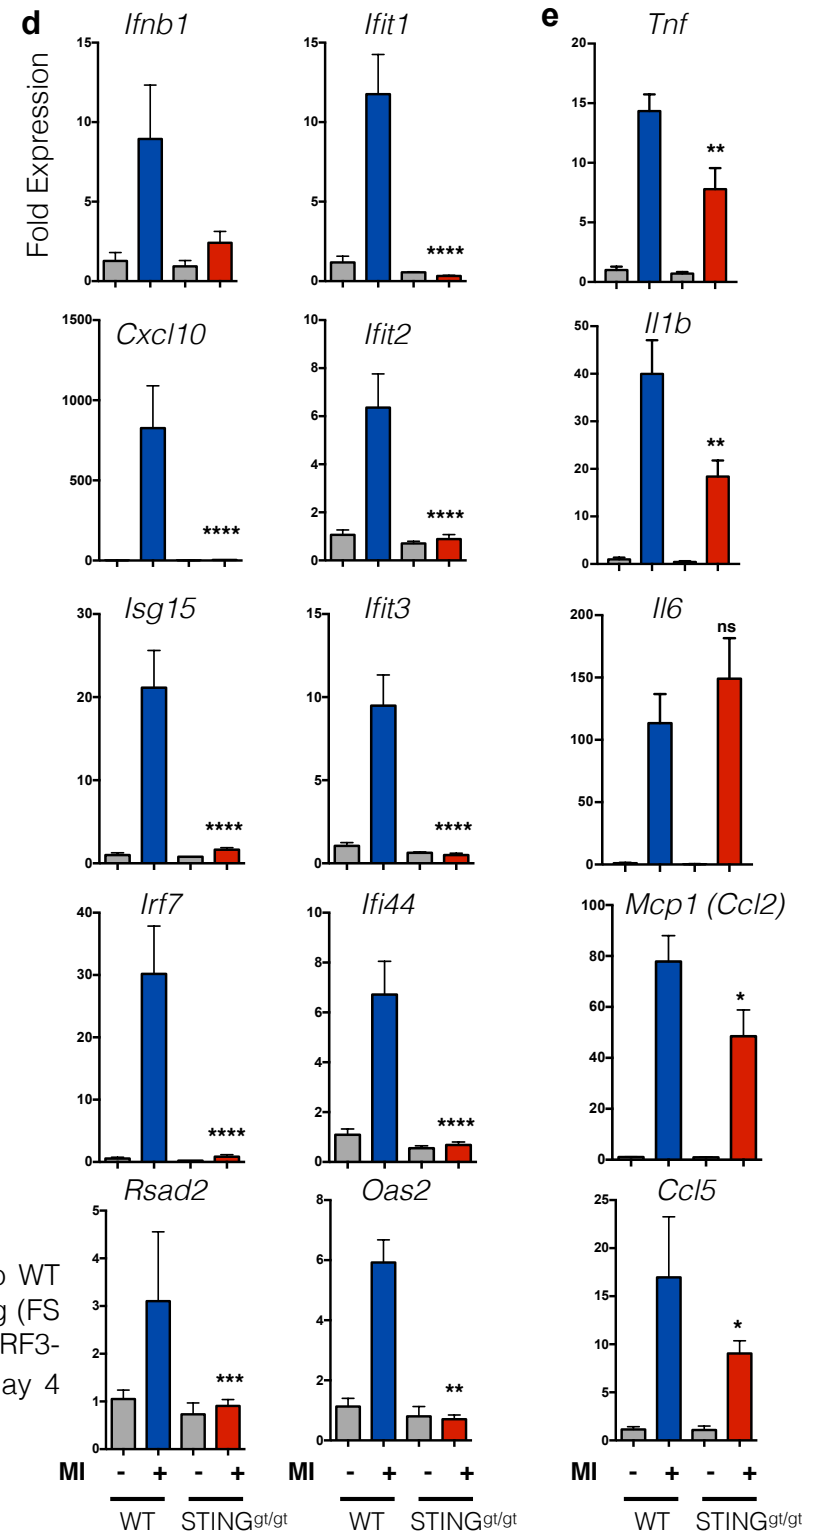

**Supplementary Fig. 11.** STING<sup>gt/gt</sup> mice response to MI. (a) 14-day survival compared to WT mice. (b) Left ventricular inner diameter at end-diastole (LVIDd) and (c) fractional shortening (FS %) measured by echocardiography on days 0, 4, and 21 after MI. Expression of (d) IRF3-dependent genes and (e) NFκB-dependent genes measured by qPCR before MI or on day 4 after MI. Mean ± s.e.m.

## Supplementary Fig. 12

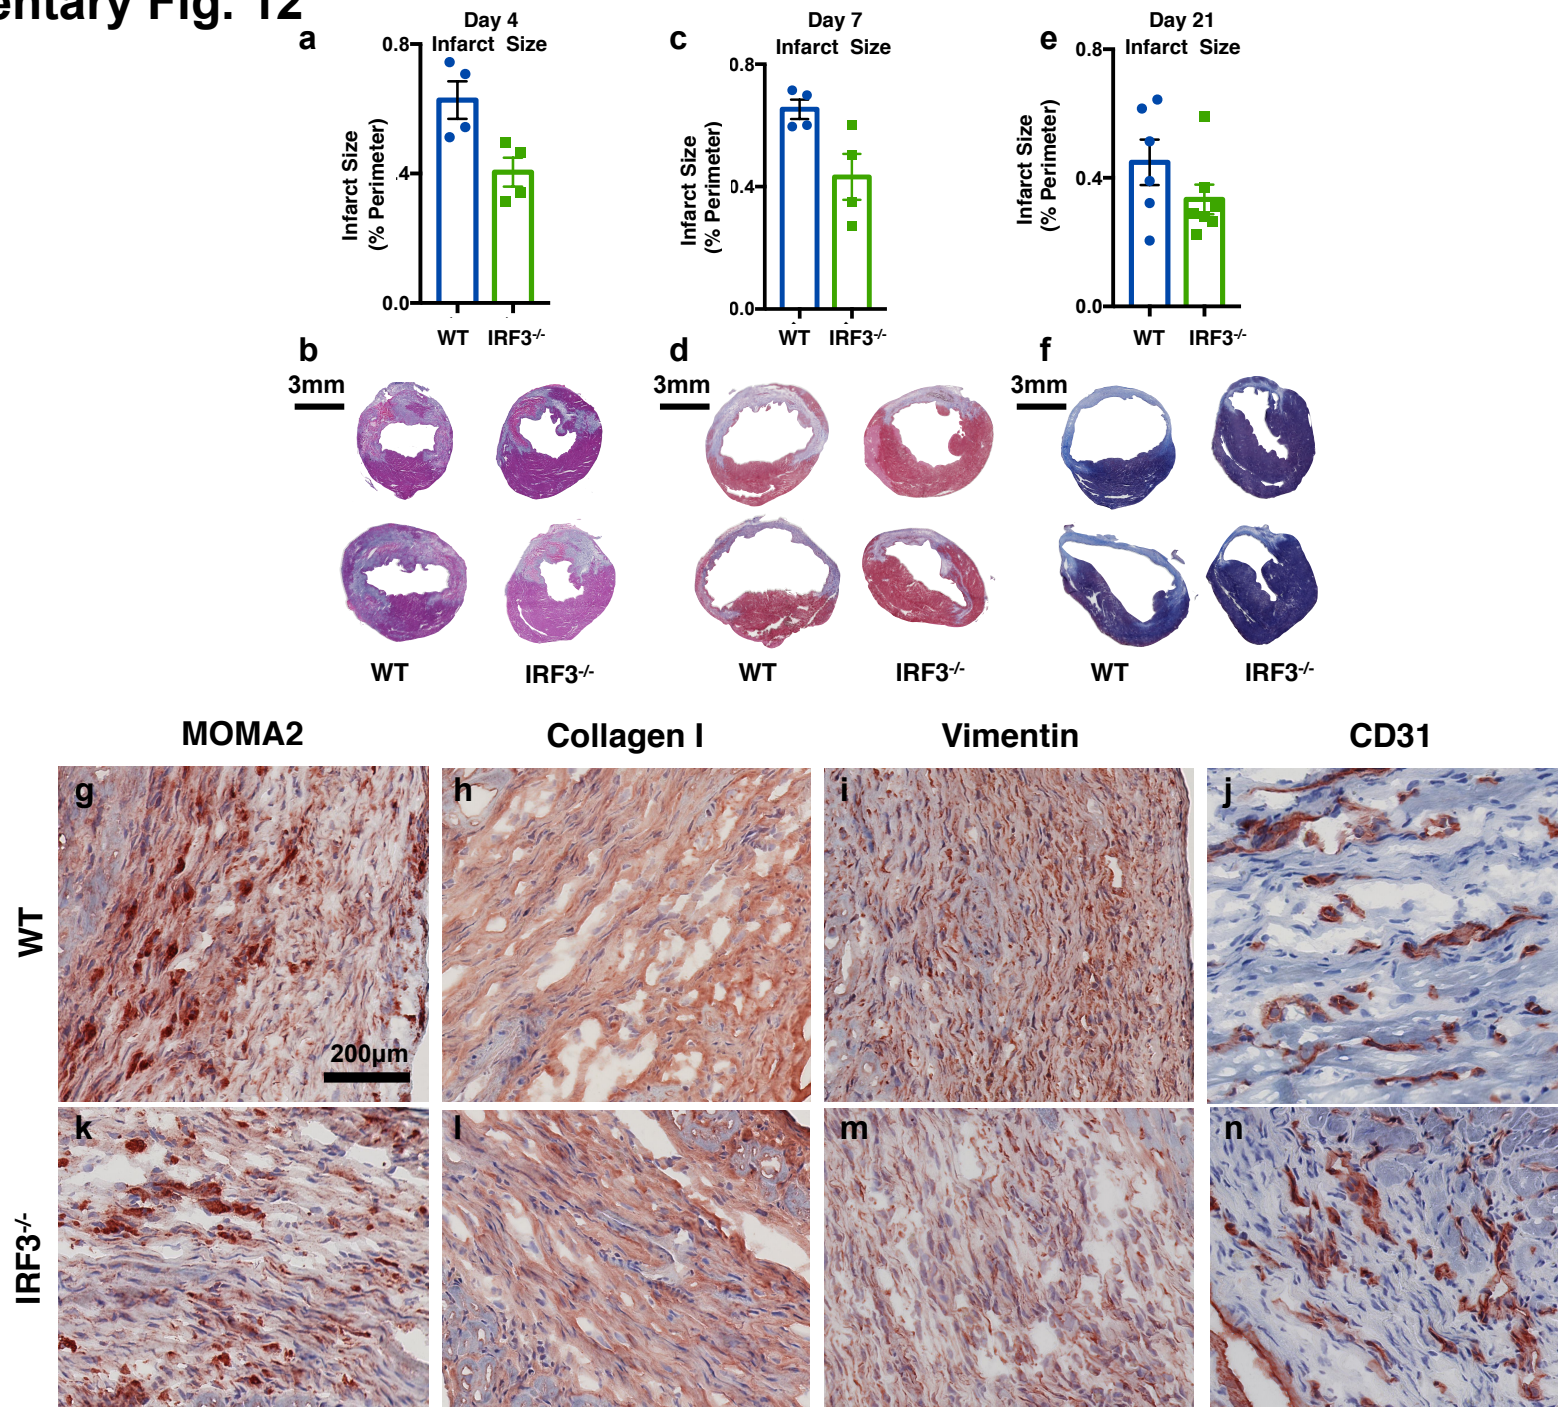

**Supplementary Figure 12.** Evaluation of infarct size from WT and IRF3<sup>-/-</sup> mice (**a,b**) on day 4, (**c,d**) day 7, and (**e,f**) day 21 by percent circumference infarct measured from H&E and Masson's Trichrome stained short axis mid-ventricle sections. Immunohistochemical staining of (**g-j**) WT and (**k-n**) IRF3<sup>-/-</sup> infarcts for (**g,k**) MOMA2, (**h,l**) Collagen I, (**i,m**) Vimentin, and (**j,n**) CD31. Scale bar in (g) applies to all immunohistochemical images (g-n).

**Table T1. Markers Genes Discriminating Granulocytes vs All Other Clusters & Expression by ImmGen Datasets V1 and V2**

|                 | p_val     | avg_diff  | pct.1 | pct.2 | Index |
|-----------------|-----------|-----------|-------|-------|-------|
| <i>Il1b</i>     | 2.75E-233 | 2.2909851 | 0.972 | 0.44  | 1     |
| <i>S100a9</i>   | 1.51E-220 | 3.8590683 | 0.768 | 0.055 | 2     |
| <i>Cxcl2</i>    | 1.13E-200 | 2.0344236 | 0.956 | 0.633 | 3     |
| <i>S100a8</i>   | 1.39E-190 | 3.6397535 | 0.693 | 0.04  | 4     |
| <i>Nfkbia</i>   | 1.65E-173 | 1.6275374 | 0.96  | 0.792 | 5     |
| <i>Srgn</i>     | 8.75E-131 | 1.6183156 | 0.925 | 0.622 | 6     |
| <i>Tnf</i>      | 3.74E-126 | 2.4882106 | 0.677 | 0.236 | 7     |
| <i>Il1r2</i>    | 2.08E-123 | 2.5301758 | 0.539 | 0.041 | 8     |
| <i>Junb</i>     | 2.34E-123 | 1.2904801 | 0.941 | 0.73  | 9     |
| <i>Zfp36</i>    | 6.85E-123 | 1.3811541 | 0.953 | 0.782 | 10    |
| <i>Clec4e</i>   | 2.08E-113 | 2.5183319 | 0.614 | 0.16  | 11    |
| <i>Nlrp3</i>    | 4.64E-111 | 2.1219958 | 0.574 | 0.135 | 12    |
| <i>Cerl2</i>    | 1.85E-110 | 1.8771336 | 0.733 | 0.326 | 13    |
| <i>Mmp9</i>     | 5.01E-110 | 2.4013915 | 0.473 | 0.027 | 14    |
| <i>Csf3r</i>    | 5.49E-105 | 1.9583639 | 0.593 | 0.164 | 15    |
| <i>Ccl3</i>     | 4.68E-101 | 2.0876752 | 0.621 | 0.283 | 16    |
| <i>Gadd45b</i>  | 2.03E-100 | 1.6992927 | 0.726 | 0.312 | 17    |
| <i>Cxcr2</i>    | 2.47E-94  | 2.6309711 | 0.44  | 0.052 | 18    |
| <i>Trem1</i>    | 1.18E-88  | 2.2536066 | 0.429 | 0.035 | 19    |
| <i>Tnfaip3</i>  | 1.61E-84  | 1.7407391 | 0.635 | 0.276 | 20    |
| <i>Csf1</i>     | 5.32E-81  | 2.4198399 | 0.337 | 0.017 | 21    |
| <i>Ptgs2</i>    | 2.22E-80  | 2.240447  | 0.525 | 0.164 | 22    |
| <i>Acod1</i>    | 6.08E-80  | 2.5844952 | 0.342 | 0.021 | 23    |
| <i>Mcl1</i>     | 4.35E-78  | 1.39455   | 0.794 | 0.547 | 24    |
| <i>Tnfaip2</i>  | 3.65E-76  | 2.1701659 | 0.492 | 0.11  | 25    |
| <i>Marcksl1</i> | 8.82E-74  | 1.7999095 | 0.496 | 0.15  | 26    |
| <i>Egr1</i>     | 4.33E-72  | 1.7659639 | 0.571 | 0.215 | 27    |
| <i>Hdc</i>      | 2.44E-69  | 2.196161  | 0.347 | 0.029 | 28    |
| <i>G0s2</i>     | 8.40E-68  | 3.0145106 | 0.304 | 0.021 | 29    |
| <i>Nfkbiz</i>   | 1.35E-64  | 1.545699  | 0.581 | 0.242 | 30    |
| <i>Btg2</i>     | 3.81E-64  | 1.6766973 | 0.541 | 0.189 | 31    |
| <i>Hcar2</i>    | 1.89E-63  | 2.0091892 | 0.389 | 0.089 | 32    |
| <i>Nfkbid</i>   | 3.10E-62  | 1.6848906 | 0.431 | 0.098 | 33    |
| <i>Pim1</i>     | 2.16E-59  | 1.2451357 | 0.693 | 0.414 | 34    |
| <i>Ppp1r15a</i> | 3.07E-56  | 1.3571891 | 0.527 | 0.187 | 35    |
| <i>Dusp2</i>    | 2.45E-54  | 1.5848908 | 0.473 | 0.155 | 36    |
| <i>Plek</i>     | 8.79E-52  | 1.3674569 | 0.525 | 0.285 | 37    |
| <i>Il1rn</i>    | 3.22E-50  | 1.6063409 | 0.499 | 0.213 | 38    |
| <i>Gsr</i>      | 1.04E-47  | 1.6869301 | 0.356 | 0.072 | 39    |
| <i>Ifitm1</i>   | 9.49E-47  | 1.1840327 | 0.433 | 0.108 | 40    |
| <i>Socs3</i>    | 5.37E-46  | 1.2096628 | 0.637 | 0.41  | 41    |
| <i>Irf1</i>     | 1.92E-45  | 1.7872454 | 0.323 | 0.08  | 42    |
| <i>Ubc</i>      | 1.13E-44  | 0.8557603 | 0.813 | 0.653 | 43    |
| <i>Cdk2ap2</i>  | 1.86E-43  | 1.5155735 | 0.389 | 0.129 | 44    |
| <i>Lmnb1</i>    | 2.21E-43  | 1.47633   | 0.361 | 0.095 | 45    |
| <i>Nr4a1</i>    | 8.36E-41  | 1.0215035 | 0.607 | 0.479 | 46    |
| <i>Cd24a</i>    | 3.74E-39  | 1.7130572 | 0.262 | 0.041 | 47    |
| <i>Vasp</i>     | 6.89E-39  | 1.2365953 | 0.361 | 0.133 | 48    |
| <i>Bcl2a1b</i>  | 6.97E-39  | 1.1759828 | 0.438 | 0.226 | 49    |
| <i>Icam1</i>    | 1.13E-37  | 1.5652636 | 0.286 | 0.073 | 50    |

V1

V2

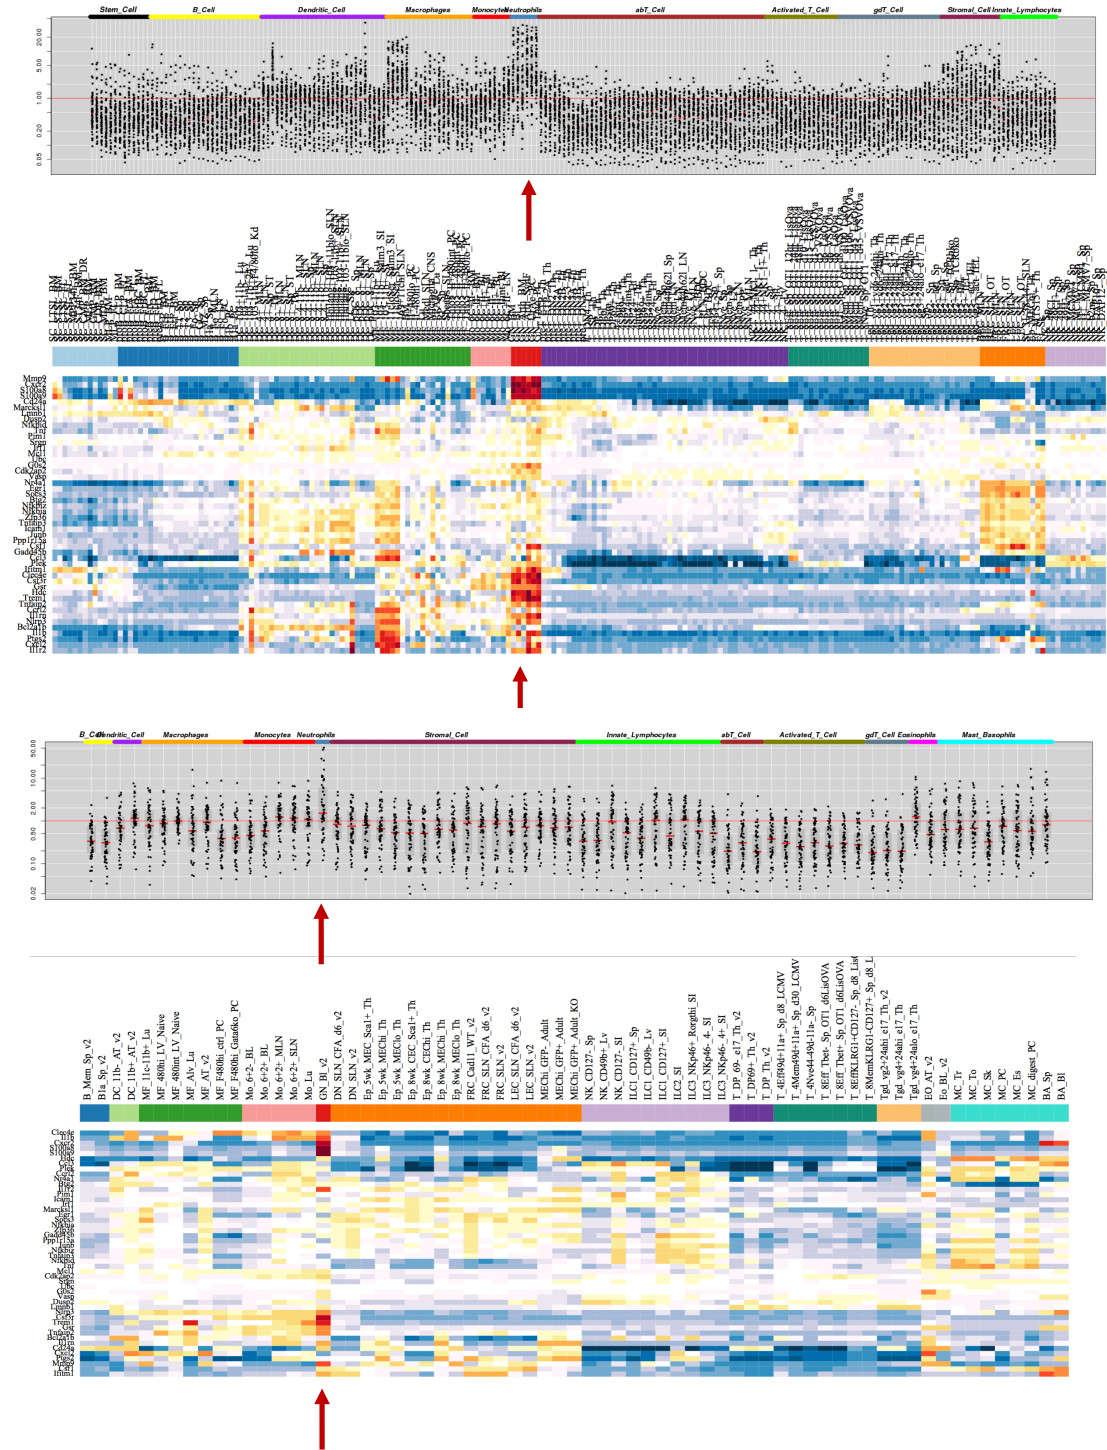

**Table T2. Marker Genes Discriminating T Cells / NK Cells vs. All Other Clusters & Expression by ImmGen Datasets V1 and V2**

|                                                 | p_val    | avg_diff | pct.1 | pct.2 | Index |
|-------------------------------------------------|----------|----------|-------|-------|-------|
|                                                 | 2.11E-30 | 3.201    | 0.571 | 0.001 | 1     |
| <b>Thy1</b>                                     | 9.02E-28 | 2.585    | 0.536 | 0.001 | 2     |
| <b>Ms4a4b</b>                                   | 5.91E-22 | 3.139    | 0.5   | 0.01  | 3     |
| <b>AW112010</b>                                 | 5.37E-21 | 3.100    | 0.5   | 0.03  | 4     |
| <b>Ccl5</b>                                     | 9.48E-15 | 3.383    | 0.429 | 0.013 | 5     |
| <b>Ctsw</b>                                     | 6.60E-14 | 2.039    | 0.286 | 0.001 | 6     |
| <b>Ptpcap</b>                                   | 2.51E-13 | 2.209    | 0.357 | 0.008 | 7     |
| <b>Gimap4</b>                                   | 4.76E-13 | 2.022    | 0.286 | 0.001 | 8     |
| <b>Gm8624</b>                                   | 1.18E-11 | 1.096    | 0.929 | 0.772 | 9     |
| <b>Ltb</b>                                      | 1.83E-10 | 2.296    | 0.393 | 0.022 | 10    |
| <b>Gm9844</b>                                   | 4.05E-10 | 1.352    | 0.75  | 0.399 | 11    |
| <b>H2.Q7</b>                                    | 1.01E-08 | 1.960    | 0.393 | 0.048 | 12    |
| <b>Jak1</b>                                     | 2.39E-08 | 1.797    | 0.393 | 0.232 | 13    |
| <b>Wdr89</b>                                    | 8.77E-08 | 0.664    | 0.679 | 0.642 | 14    |
| <b>Ndufb10</b>                                  | 2.54E-07 | 1.897    | 0.321 | 0.092 | 15    |
| <b>Ptma</b>                                     | 5.96E-07 | 1.010    | 0.821 | 0.564 | 16    |
| <b>Tpt1</b>                                     | 1.46E-06 | 0.688    | 1     | 0.899 | 17    |
| <b>Tmsb10</b>                                   | 1.96E-06 | 1.250    | 0.5   | 0.262 | 18    |
| <b>Ywhaq</b>                                    | 2.92E-06 | 1.383    | 0.286 | 0.119 | 19    |
| <b>Gm17541</b>                                  | 3.37E-06 | 0.801    | 0.643 | 0.526 | 20    |
| <b>Cox6b1</b>                                   | 4.46E-06 | 0.595    | 0.071 | 0.272 | 21    |
| <b>Pfn1</b>                                     | 6.87E-06 | 0.931    | 0.607 | 0.503 | 22    |
| <b>NOTE:</b>                                    |          |          |       |       |       |
| <b>Marker genes not included if p &lt; 1E-6</b> |          |          |       |       |       |

V1

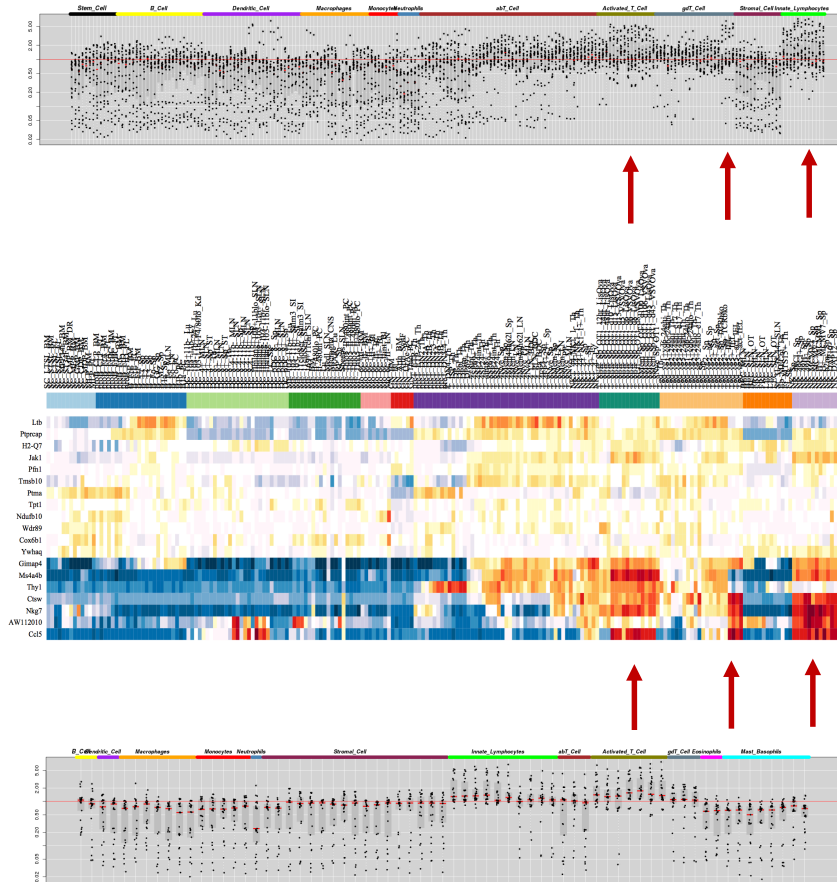

V2

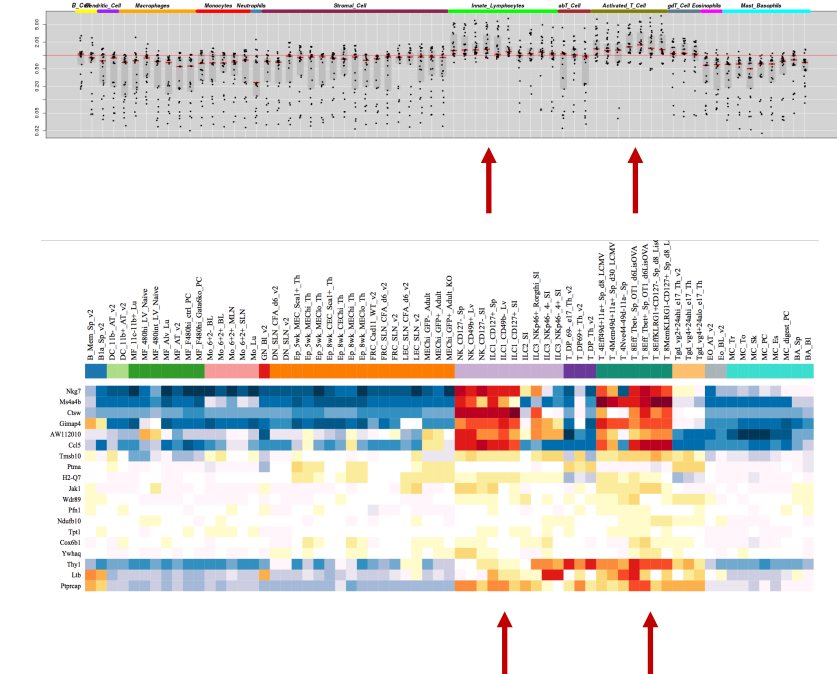

**Table T3. Marker Genes Discriminating Monocytes vs. All Other Clusters & Expression by ImmGen Datasets V1 and V2**

|                                       | p_val    | avg_diff  | pct.1 | pct.2 | Index |
|---------------------------------------|----------|-----------|-------|-------|-------|
|                                       | 3.03E-39 | 1.8878141 | 0.725 | 0.149 | 1     |
| <b>Lyz2</b>                           | 2.41E-35 | 1.2687296 | 0.99  | 0.711 | 2     |
| <b>Gm9844</b>                         | 9.60E-28 | 1.2664972 | 0.775 | 0.383 | 3     |
| <b>Ifitm6</b>                         | 8.44E-26 | 1.6556575 | 0.392 | 0.037 | 4     |
| <b>Actg1</b>                          | 2.47E-24 | 0.7137467 | 0.99  | 0.896 | 5     |
| <b>Ly6c2</b>                          | 1.48E-21 | 1.2193561 | 0.333 | 0.031 | 6     |
| <b>Ifitm3</b>                         | 3.38E-20 | 1.0655717 | 0.804 | 0.438 | 7     |
| <b>Tmsb10</b>                         | 4.36E-20 | 1.2128101 | 0.627 | 0.244 | 8     |
| <b>S100a4</b>                         | 6.84E-20 | 0.979081  | 0.824 | 0.387 | 9     |
| <b>Hp</b>                             | 9.86E-19 | 1.6577249 | 0.353 | 0.049 | 10    |
| <b>Ms4a6c</b>                         | 2.82E-14 | 0.982726  | 0.735 | 0.455 | 11    |
| <b>Ccr2</b>                           | 4.71E-14 | 1.099587  | 0.598 | 0.246 | 12    |
| <b>Chil3</b>                          | 1.29E-13 | 1.3852834 | 0.284 | 0.058 | 13    |
| <b>Vim</b>                            | 6.34E-13 | 0.7650885 | 0.882 | 0.618 | 14    |
| <b>C3</b>                             | 7.92E-13 | 1.1174667 | 0.284 | 0.048 | 15    |
| <b>Thbs1</b>                          | 1.20E-12 | 1.076147  | 0.549 | 0.228 | 16    |
| <b>Napsa</b>                          | 1.34E-12 | 1.1354792 | 0.373 | 0.09  | 17    |
| <b>Eef1a1</b>                         | 9.84E-12 | 0.5187097 | 0.99  | 0.891 | 18    |
| <b>Tpt1</b>                           | 1.02E-11 | 0.442213  | 1     | 0.895 | 19    |
| <b>Coro1a</b>                         | 1.57E-11 | 0.705812  | 0.735 | 0.465 | 20    |
| <b>Fn1</b>                            | 7.56E-11 | 0.8665351 | 0.716 | 0.423 | 21    |
| <b>S100a6</b>                         | 1.07E-10 | 0.6609656 | 0.784 | 0.534 | 22    |
| <b>Gm8624</b>                         | 1.79E-10 | 0.4686089 | 0.951 | 0.764 | 23    |
| <b>Emilin2</b>                        | 2.30E-10 | 1.1750277 | 0.422 | 0.177 | 24    |
| <b>Cybb</b>                           | 2.11E-09 | 0.9376377 | 0.559 | 0.341 | 25    |
| <b>Samhd1</b>                         | 1.12E-08 | 0.9602754 | 0.5   | 0.326 | 26    |
| <b>Srgn</b>                           | 1.39E-08 | 0.3066088 | 0.902 | 0.679 | 27    |
| <b>Ptpn1</b>                          | 1.40E-08 | 0.8968721 | 0.51  | 0.244 | 28    |
| <b>Ahnak</b>                          | 1.85E-08 | 0.9263587 | 0.529 | 0.285 | 29    |
| <b>Smpd13a</b>                        | 3.59E-08 | 1.087457  | 0.304 | 0.107 | 30    |
| <b>Msrb1</b>                          | 4.02E-08 | 0.8124817 | 0.52  | 0.271 | 31    |
| <b>Cytip</b>                          | 5.54E-08 | 0.9833889 | 0.324 | 0.106 | 32    |
| <b>Ifitm2</b>                         | 7.70E-08 | 0.6827715 | 0.627 | 0.356 | 33    |
| <b>Alox5ap</b>                        | 2.13E-07 | 0.6324217 | 0.716 | 0.511 | 34    |
| <b>Plbd1</b>                          | 2.84E-07 | 0.8345495 | 0.431 | 0.181 | 35    |
| <b>Il17ra</b>                         | 3.15E-07 | 1.2383521 | 0.275 | 0.103 | 36    |
| <b>Crip1</b>                          | 4.91E-07 | 0.8000464 | 0.539 | 0.318 | 37    |
| <b>Lgals3</b>                         | 9.64E-07 | 0.447887  | 0.735 | 0.503 | 38    |
| <b>Pld4</b>                           | 1.41E-06 | 0.79186   | 0.382 | 0.207 | 39    |
| <b>Ly6e</b>                           | 3.79E-06 | 0.5204468 | 0.725 | 0.473 | 40    |
| <b>Ccl9</b>                           | 5.18E-06 | 0.7466229 | 0.471 | 0.261 | 41    |
| <b>Flna</b>                           | 6.42E-06 | 0.7747612 | 0.5   | 0.288 | 42    |
| <b>F13a1</b>                          | 9.40E-06 | 0.9309539 | 0.324 | 0.149 | 43    |
| NOTE:                                 |          |           |       |       |       |
| Marker genes not included if p < 1E-6 |          |           |       |       |       |

V1

V2

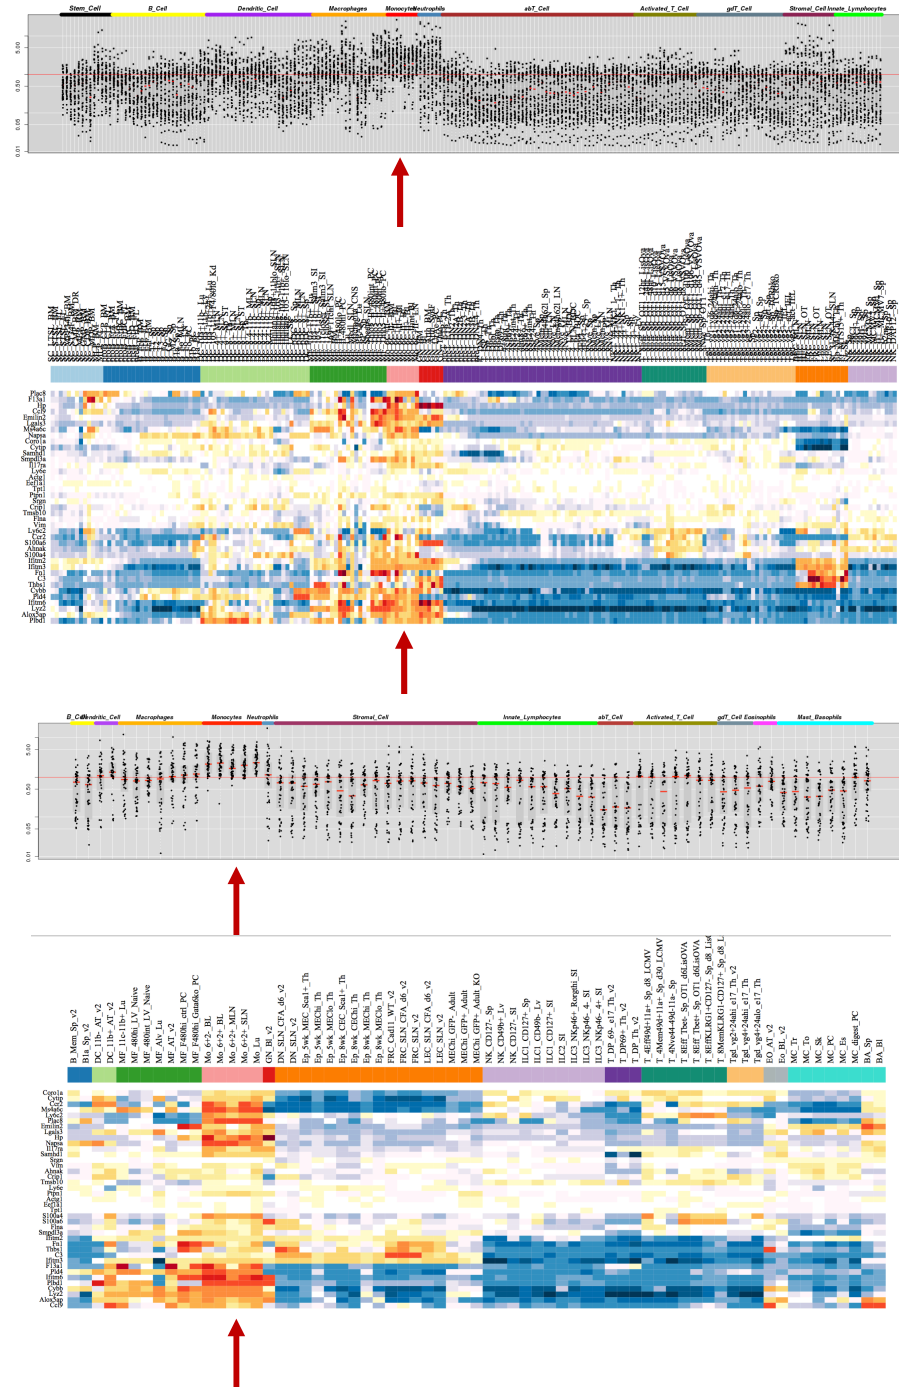



**Table T4. Marker Genes Discriminating DCs and MHCII Macrophages vs All Other Clusters & Expression by ImmGen Datasets V1 and V2**

|                | p_val     | avg_diff  | pct.1 | pct.2 | Index |
|----------------|-----------|-----------|-------|-------|-------|
|                | 1.40E-243 | 2.8953498 | 0.964 | 0.264 | 1     |
| H2.Eb1         | 3.83E-235 | 2.9838973 | 0.952 | 0.257 | 2     |
| Cd74           | 7.45E-234 | 2.5191718 | 0.976 | 0.318 | 3     |
| H2.Ab1         | 1.74E-212 | 2.6588799 | 0.919 | 0.135 | 4     |
| H2.DMb1        | 4.47E-70  | 1.8297806 | 0.497 | 0.069 | 5     |
| H2.DMa         | 1.28E-61  | 1.5305527 | 0.506 | 0.098 | 6     |
| Tmem176b       | 3.87E-34  | 1.302146  | 0.401 | 0.103 | 7     |
| Eef1a1         | 9.69E-33  | 0.4482603 | 0.994 | 0.875 | 8     |
| Plbd1          | 4.82E-27  | 0.8231155 | 0.428 | 0.143 | 9     |
| Rack1          | 3.42E-25  | 0.5179049 | 0.889 | 0.64  | 10    |
| Hspa1b         | 4.20E-25  | 1.1437332 | 0.434 | 0.159 | 11    |
| Napsa          | 5.83E-23  | 0.9680064 | 0.281 | 0.067 | 12    |
| Tpt1           | 9.82E-23  | 0.3335181 | 0.979 | 0.884 | 13    |
| Olfm1          | 8.12E-22  | 1.1609463 | 0.263 | 0.068 | 14    |
| Gm8624         | 2.23E-21  | 0.438577  | 0.922 | 0.741 | 15    |
| Gm2a           | 8.49E-21  | 0.7535648 | 0.599 | 0.329 | 16    |
| Crip1          | 3.84E-19  | 0.791396  | 0.515 | 0.29  | 17    |
| Cst3           | 6.34E-18  | 0.6352142 | 0.832 | 0.67  | 18    |
| Gm17541        | 1.72E-17  | 0.4496434 | 0.731 | 0.483 | 19    |
| Gng10          | 2.31E-16  | 0.9078513 | 0.32  | 0.121 | 20    |
| Hspa1a         | 1.39E-15  | 0.8332575 | 0.446 | 0.22  | 21    |
| Syng2          | 6.56E-15  | 0.8156688 | 0.29  | 0.118 | 22    |
| Hspa8          | 6.59E-15  | 0.3736983 | 0.856 | 0.669 | 23    |
| S100a4         | 1.54E-14  | 0.6766029 | 0.584 | 0.373 | 24    |
| Eef1b2         | 2.84E-14  | 0.499485  | 0.599 | 0.358 | 25    |
| Actg1          | 9.28E-14  | 0.250814  | 0.97  | 0.886 | 26    |
| Cd83           | 2.01E-13  | 0.8340102 | 0.383 | 0.19  | 27    |
| Cnn2           | 2.44E-13  | 0.7243477 | 0.281 | 0.106 | 28    |
| Ifitm1         | 3.11E-13  | 1.0591874 | 0.323 | 0.152 | 29    |
| Ccr2           | 5.83E-13  | 0.5874642 | 0.437 | 0.228 | 30    |
| Ifitm3         | 8.31E-12  | 0.534256  | 0.614 | 0.424 | 31    |
| Ctss           | 2.08E-11  | 0.342482  | 0.829 | 0.638 | 32    |
| Sub1           | 2.10E-11  | 0.705828  | 0.35  | 0.173 | 33    |
| Il2rg          | 4.17E-11  | 0.870753  | 0.269 | 0.127 | 34    |
| Wdr89          | 5.16E-11  | 0.3765699 | 0.787 | 0.61  | 35    |
| Actb           | 5.24E-11  | 0.2669947 | 0.979 | 0.906 | 36    |
| Tmsb10         | 9.25E-11  | 0.5830557 | 0.416 | 0.232 | 37    |
| Gm9844         | 1.77E-10  | 0.5090478 | 0.524 | 0.378 | 38    |
| Plac8          | 2.67E-10  | 0.5605564 | 0.317 | 0.151 | 39    |
| Eif3f          | 5.21E-10  | 0.6562466 | 0.317 | 0.155 | 40    |
| Cybb           | 7.41E-10  | 0.453552  | 0.515 | 0.318 | 41    |
| Eef2           | 3.42E-09  | 0.397018  | 0.629 | 0.442 | 42    |
| H2afy          | 3.52E-09  | 0.7383702 | 0.365 | 0.199 | 43    |
| Ctsh           | 4.78E-09  | 0.4856672 | 0.521 | 0.337 | 44    |
| Npm1           | 4.79E-09  | 0.413198  | 0.389 | 0.218 | 45    |
| X1700073E17Rik | 1.10E-08  | 0.393853  | 0.485 | 0.311 | 46    |
| H2afz          | 1.86E-08  | 0.4343918 | 0.434 | 0.259 | 47    |
| Lsp1           | 1.93E-08  | 0.4149484 | 0.392 | 0.228 | 48    |
| Pld4           | 2.75E-08  | 0.3298967 | 0.341 | 0.19  | 49    |
| Atox1          | 7.83E-08  | 0.386581  | 0.449 | 0.282 | 50    |

V1

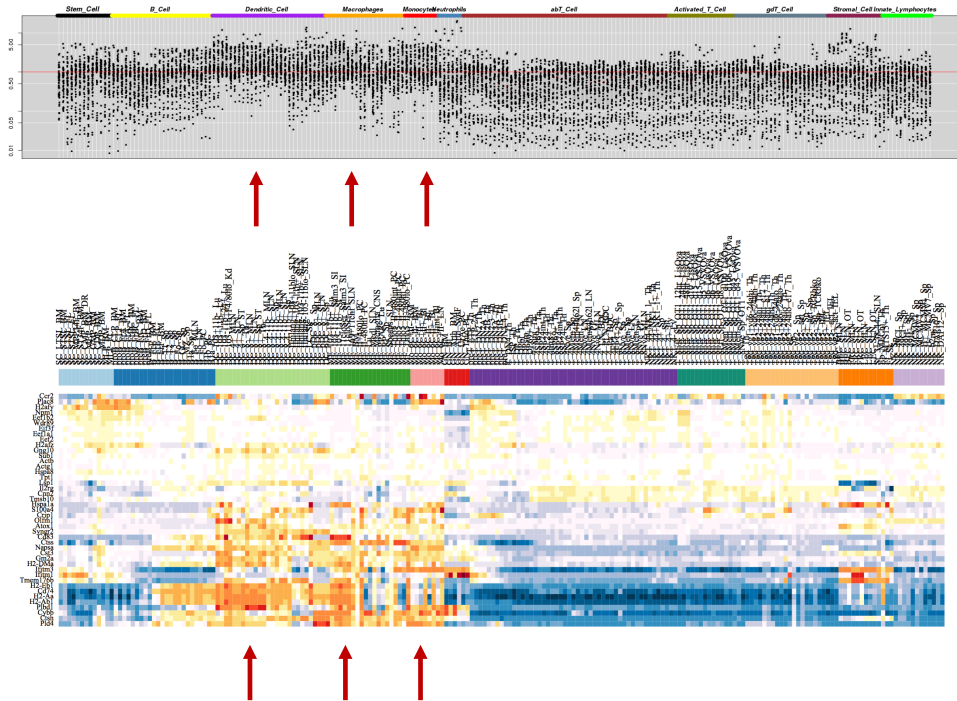

V2

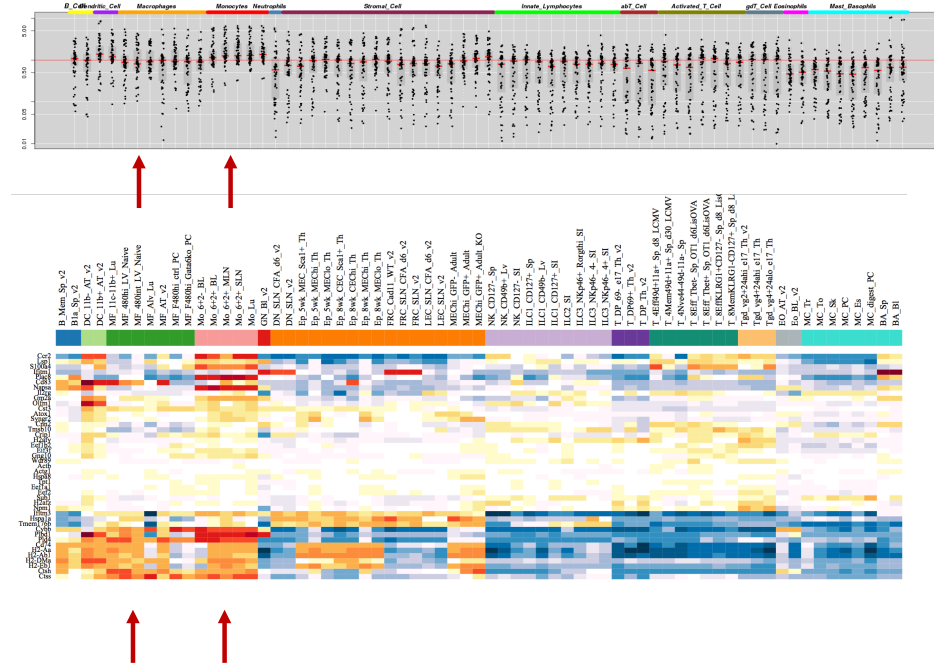

**Table T5. Marker Genes Discriminating IFNIC Cardiac Macrophages vs All Other Clusters & Expression by ImmGen Datasets V1 and V2**

|               | p_val    | avg_diff  | pct.1 | pct.2 | Index |
|---------------|----------|-----------|-------|-------|-------|
| Ifit2         | 9.20E-40 | 2.2497772 | 0.341 | 0.012 | 1     |
| Irf7          | 8.95E-37 | 1.633694  | 0.543 | 0.087 | 2     |
| Ifit1         | 1.20E-31 | 1.7309566 | 0.304 | 0.015 | 3     |
| Mx1           | 6.33E-28 | 1.7234805 | 0.29  | 0.018 | 4     |
| Ms4a4c        | 1.34E-27 | 1.6791356 | 0.486 | 0.098 | 5     |
| Usp18         | 3.68E-26 | 1.6709251 | 0.304 | 0.025 | 6     |
| Ifi47         | 5.29E-25 | 1.611792  | 0.333 | 0.039 | 7     |
| Ifitm3        | 1.16E-24 | 0.8960768 | 0.633 | 0.428 | 8     |
| Ly6a          | 5.64E-23 | 1.7662152 | 0.37  | 0.065 | 9     |
| Bst2          | 5.35E-22 | 1.1259478 | 0.616 | 0.217 | 10    |
| Cxcl10        | 7.13E-22 | 1.9792523 | 0.348 | 0.081 | 11    |
| Fcgr1         | 7.69E-22 | 1.1204018 | 0.601 | 0.202 | 12    |
| Znfx1         | 5.39E-20 | 1.1780485 | 0.348 | 0.059 | 13    |
| Ifi203        | 1.25E-19 | 1.5970446 | 0.333 | 0.055 | 14    |
| Pyhin1        | 1.55E-19 | 1.2952298 | 0.348 | 0.059 | 15    |
| Lgals3bp      | 3.66E-19 | 1.0383473 | 0.594 | 0.222 | 16    |
| Ccl12         | 1.24E-17 | 1.3153175 | 0.384 | 0.091 | 17    |
| Ly6e          | 1.36E-17 | 0.7720473 | 0.604 | 0.461 | 18    |
| Oasl2         | 1.67E-17 | 0.964558  | 0.333 | 0.062 | 19    |
| Pnp           | 2.48E-17 | 1.191605  | 0.543 | 0.225 | 20    |
| Stat1         | 1.54E-16 | 1.0485965 | 0.406 | 0.103 | 21    |
| Sdc3          | 2.86E-16 | 0.9764329 | 0.58  | 0.242 | 22    |
| Zbp1          | 1.72E-15 | 1.2092081 | 0.312 | 0.061 | 23    |
| Lgals9        | 2.50E-13 | 0.9123917 | 0.5   | 0.193 | 24    |
| Ms4a6c        | 6.52E-13 | 0.5775978 | 0.754 | 0.448 | 25    |
| Ctsb          | 5.21E-12 | 0.3376105 | 0.942 | 0.759 | 26    |
| Fcgr4         | 1.08E-10 | 0.9167507 | 0.312 | 0.088 | 27    |
| Apoe          | 1.42E-10 | 0.4337064 | 0.506 | 0.666 | 28    |
| Grn           | 2.17E-10 | 0.518762  | 0.662 | 0.647 | 29    |
| Rtp4          | 2.65E-10 | 1.1326315 | 0.268 | 0.067 | 30    |
| Ifi2712a      | 2.69E-10 | 0.9023308 | 0.384 | 0.144 | 31    |
| Sp100         | 4.33E-10 | 0.8399678 | 0.37  | 0.128 | 32    |
| Sifn1         | 5.71E-10 | 0.7848551 | 0.275 | 0.075 | 33    |
| Plac8         | 6.99E-10 | 1.145184  | 0.399 | 0.163 | 34    |
| B2m           | 7.32E-10 | 0.4687053 | 0.906 | 0.787 | 35    |
| Ms4a6b        | 8.85E-10 | 0.961677  | 0.406 | 0.177 | 36    |
| Ccl2          | 3.80E-09 | 0.9394994 | 0.449 | 0.202 | 37    |
| Npc2          | 9.58E-09 | 0.6071815 | 0.717 | 0.474 | 38    |
| Trafd1        | 1.60E-08 | 0.8169772 | 0.268 | 0.08  | 39    |
| Nampt         | 2.06E-08 | 0.8239477 | 0.254 | 0.073 | 40    |
| Ms4a6d        | 4.54E-08 | 0.527764  | 0.601 | 0.341 | 41    |
| Hspa1a        | 6.67E-08 | 0.4658433 | 0.486 | 0.243 | 42    |
| Cybb          | 1.22E-07 | 0.5927865 | 0.587 | 0.334 | 43    |
| Ms4a7         | 1.37E-07 | 0.7091168 | 0.406 | 0.201 | 44    |
| Lgmn          | 1.72E-07 | 0.4431669 | 0.775 | 0.542 | 45    |
| Tor1aip1      | 1.95E-07 | 0.6572156 | 0.29  | 0.103 | 46    |
| F630040K05Rik | 2.30E-07 | 0.690849  | 0.254 | 0.087 | 47    |
| Tmsb10        | 2.49E-07 | 0.428099  | 0.471 | 0.249 | 48    |
| Ctss          | 2.66E-07 | 0.4280548 | 0.555 | 0.658 | 49    |
| H2.K1         | 4.79E-07 | 0.485526  | 0.775 | 0.551 | 50    |

V1

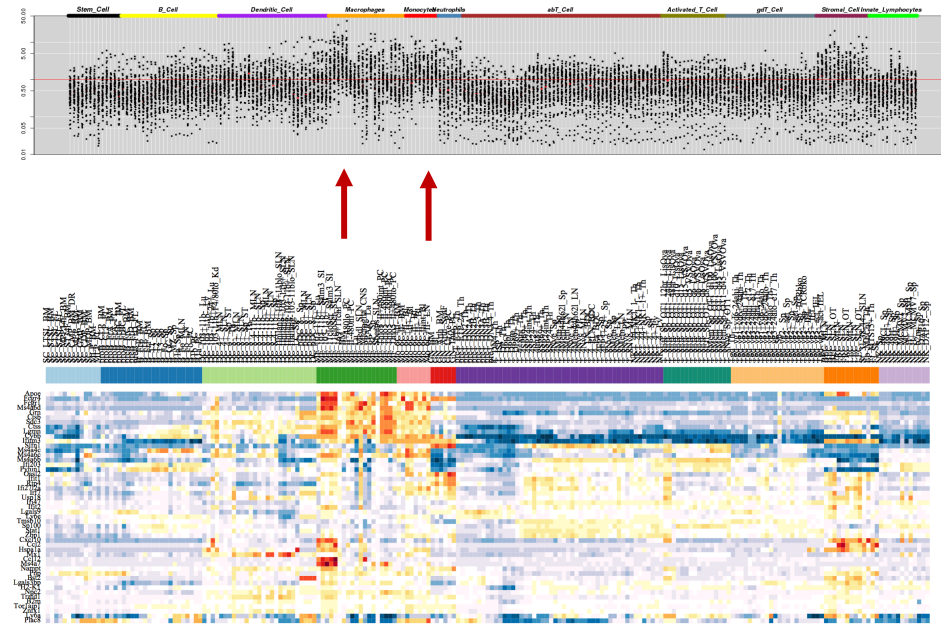

V2

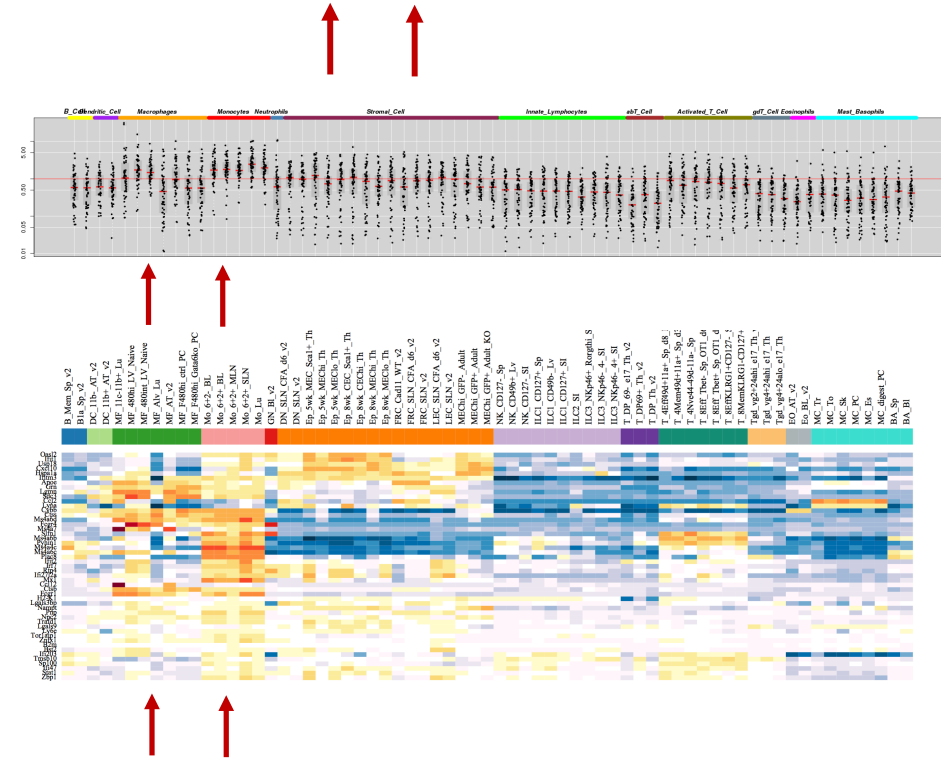



**Table T7. Marker Genes Discriminating IFNIC Cardiac Macrophage vs. Nearest Macrophage Clusters**

|                           | p_val    | avg_diff | pct.1    | pct.2 | Index | Known IRF3- |   |
|---------------------------|----------|----------|----------|-------|-------|-------------|---|
| Top 25 IFNIC Marker Genes | Isg15    | 7.25E-43 | 2.385147 | 0.761 | 0.1   | 1           | 1 |
|                           | Ifit3    | 2.29E-30 | 2.137082 | 0.42  | 0.004 | 2           | 1 |
|                           | Ifitm3   | 8.34E-29 | 1.357727 | 0.833 | 0.362 | 3           | 1 |
|                           | Rsad2    | 1.70E-27 | 2.598378 | 0.457 | 0.029 | 4           | 1 |
|                           | Irf7     | 2.65E-27 | 1.873448 | 0.543 | 0.057 | 5           | 1 |
|                           | Ly6e     | 8.85E-26 | 1.288033 | 0.804 | 0.283 | 6           | 1 |
|                           | Ms4a4c   | 1.05E-24 | 1.962114 | 0.486 | 0.043 | 7           |   |
|                           | Ifit2    | 2.99E-23 | 2.398901 | 0.341 | 0.004 | 8           | 1 |
|                           | Plac8    | 6.95E-23 | 2.723074 | 0.399 | 0.029 | 9           |   |
|                           | Ifit1    | 3.83E-22 | 1.912645 | 0.304 | 0     | 10          | 1 |
|                           | Ly6a     | 1.32E-19 | 2.175935 | 0.37  | 0.025 | 11          | 1 |
|                           | Mx1      | 3.16E-19 | 1.922466 | 0.29  | 0.007 | 12          | 1 |
|                           | Ifi47    | 1.62E-17 | 1.823248 | 0.333 | 0.025 | 13          | 1 |
|                           | Ifi203   | 4.57E-17 | 1.93192  | 0.333 | 0.032 | 14          | 1 |
|                           | Usp18    | 4.73E-16 | 1.787204 | 0.304 | 0.018 | 15          | 1 |
|                           | Sifn1    | 2.22E-15 | 1.851305 | 0.275 | 0.018 | 16          | 1 |
|                           | Stat1    | 6.60E-15 | 1.172177 | 0.406 | 0.068 | 17          | 1 |
|                           | Znfx1    | 5.53E-14 | 1.272844 | 0.348 | 0.047 | 18          | 1 |
|                           | Cxcl10   | 9.33E-14 | 2.163769 | 0.348 | 0.075 | 19          | 1 |
|                           | Pyhin1   | 1.03E-13 | 1.507318 | 0.348 | 0.057 | 20          | 1 |
|                           | Oasl2    | 4.94E-13 | 1.213093 | 0.333 | 0.05  | 21          | 1 |
|                           | Zbp1     | 9.59E-13 | 1.423133 | 0.312 | 0.039 | 22          | 1 |
|                           | Fgl2     | 1.20E-11 | 1.626506 | 0.297 | 0.043 | 23          |   |
|                           | Bst2     | 2.09E-11 | 0.856792 | 0.616 | 0.251 | 24          | 1 |
|                           | Ifi2712a | 3.84E-11 | 1.183773 | 0.384 | 0.09  | 25          | 1 |
|                           | Lgals3bp | 4.84E-11 | 0.838703 | 0.594 | 0.24  | 26          |   |
|                           | Cybb     | 7.47E-11 | 0.997945 | 0.587 | 0.258 | 27          |   |
|                           | Pnp      | 2.07E-10 | 1.018324 | 0.543 | 0.208 | 28          |   |
|                           | B2m      | 3.41E-10 | 0.542516 | 0.906 | 0.785 | 29          |   |
|                           | Cd52     | 4.07E-10 | 0.879583 | 0.674 | 0.333 | 30          |   |
|                           | Rtp4     | 8.23E-10 | 1.101674 | 0.268 | 0.043 | 31          |   |
|                           | Fcgr1    | 1.19E-09 | 0.745661 | 0.601 | 0.272 | 32          |   |
|                           | Fcgr4    | 4.65E-09 | 1.113389 | 0.312 | 0.068 | 33          |   |
|                           | Sp100    | 5.79E-09 | 1.039746 | 0.37  | 0.115 | 34          |   |
|                           | Ms4a6c   | 6.95E-09 | 0.546688 | 0.754 | 0.448 | 35          |   |
|                           | H2.K1    | 1.37E-08 | 0.760059 | 0.775 | 0.516 | 36          |   |
|                           | Cd74     | 2.06E-08 | 1.284161 | 0.514 | 0.29  | 37          |   |
|                           | H2.Aa    | 2.33E-08 | 1.671911 | 0.442 | 0.215 | 38          |   |
|                           | Ccl12    | 6.95E-08 | 1.018449 | 0.384 | 0.125 | 39          |   |
|                           | Lgals9   | 7.09E-08 | 0.851786 | 0.5   | 0.215 | 40          |   |
|                           | Ms4a6b   | 7.93E-08 | 1.087127 | 0.406 | 0.172 | 41          |   |
|                           | H2.T23   | 1.14E-07 | 0.604112 | 0.399 | 0.143 | 42          |   |
|                           | Cdkn1a   | 2.15E-07 | 0.780549 | 0.543 | 0.262 | 43          |   |
|                           | Psme1    | 5.02E-07 | 1.025067 | 0.333 | 0.115 | 44          |   |
|                           | Tmsb10   | 8.74E-07 | 0.666882 | 0.471 | 0.208 | 45          |   |
|                           | Ccl4     | 9.66E-07 | 0.924913 | 0.572 | 0.337 | 46          |   |
|                           | Ccdc62   | 1.15E-06 | 0.507871 | 0.29  | 0.093 | 47          |   |
|                           | H2.Eb1   | 2.20E-06 | 1.527816 | 0.37  | 0.222 | 48          |   |
|                           | Samhd1   | 3.04E-06 | 0.855966 | 0.493 | 0.247 | 49          |   |
|                           | Zfp36    | 8.84E-06 | 0.458738 | 0.862 | 0.688 | 50          |   |
